1 **Atropselective Oxidation of 2,2',3,3',4,6'-Hexachlorobiphenyl**  
2 **(PCB 132) to Hydroxylated Metabolites by Human Liver**  
3 **Microsomes: Involvement of Arene Oxide Intermediates**

4

5 Eric Uwimana<sup>a</sup>, Xueshu Li<sup>a</sup>, Coby Yeung<sup>b</sup>, Eric V. Patterson<sup>b</sup> and Hans-Joachim Lehmler<sup>a</sup>

6

7 <sup>a</sup>Interdisciplinary Graduate Program in Human Toxicology and Department of Occupational and  
8 Environmental Health, College of Public Health, The University of Iowa, Iowa City, Iowa. <sup>b</sup>Department  
9 of Chemistry, College of Arts and Sciences, Stony Brook University, Stony Brook, New York.

10

11 Corresponding Author:

12 Dr. Hans-Joachim Lehmler

13 The University of Iowa

14 Department of Occupational and Environmental Health

15 University of Iowa Research Park, B164 MTF

16 Iowa City, IA 52242-5000

17 Phone: (319) 335-4981

18 Fax: (319) 335-4290

19 e-mail: [hans-joachim-lehmler@uiowa.edu](mailto:hans-joachim-lehmler@uiowa.edu)

20

21 **Abstract**

22 PCBs and their hydroxylated metabolites have been associated with neurodevelopmental  
23 disorders. Several neurotoxic congeners display axial chirality and atropselectively affect cellular targets  
24 implicated in PCB developmental neurotoxicity; however, only limited information is available  
25 regarding the metabolism of these congeners in humans. We hypothesize that the oxidation of  
26 2,2',3,3',4,6'-hexachlorobiphenyl (PCB 132) by human liver microsomes (HLMs) is atropselective and  
27 displays inter-individual variability. To test this hypothesis, PCB 132 (50  $\mu$ M) was incubated with  
28 pooled or single donor HLMs for 10, 30 or 120 min at 37 °C, and levels and enantiomeric fractions of  
29 PCB 132 and its metabolites were determined gas chromatographically. The major metabolite formed  
30 by different HLM preparations was either 2,2',3,4,4',6'-hexachlorobiphenyl-3'-ol (3'-140) or  
31 2,2',3,3',4,6'-hexachlorobiphenyl-5'-ol (5'-132). 2,2',3,3',4,6'-Hexachlorobiphenyl-4'-ol (4'-132) and  
32 2,2',3,3',4,6'-hexachlorobiphenyl-4',5'-diol (4',5'-132) were minor metabolites. The second eluting  
33 atropisomer of PCB 132 was slightly enriched in some HLM incubations. The formation of the first  
34 eluting atropisomer of 3'-140 was nearly enantiospecific (EF > 0.8). The second eluting atropisomer of  
35 5'-132 was enriched in all microsomal preparations investigated. EF values differed slightly between  
36 single donor HLM preparations (EF = 0.84 to 0.96 for 3'-140; EF = 0.12 to 0.19 for 5'-132). These  
37 findings suggest that there are inter-individual differences in the atropselective biotransformation of  
38 PCB 132 to OH-PCBs in humans that may affect neurotoxic outcomes.

39

40 **Keywords:** 1,2-shift, arene oxide, biotransformation, cytochrome P450 enzyme, enantiomers, liver  
41 microsomes.

42

## 43 1. Introduction

44 PCB congeners with a 2,3,6-chlorine substitution pattern on one phenyl ring, such as PCB 132,  
45 are important components of commercial PCB mixtures (Kania-Korwel and Lehmler, 2016a). Food is  
46 the major source of exposure to these and other PCB congeners (Schechter et al., 2010; Su et al., 2012;  
47 Voorspoels et al., 2008). PCB 132 has been detected in fish species caught for human consumption  
48 (Wong et al., 2001). Moreover, PCB 132 is present in the indoor air of New York City schools (Thomas  
49 et al., 2012), raising concerns about inhalation exposure of school children, teachers and staff to PCB  
50 132 and structurally related PCB congeners (Herrick et al., 2016). Like other PCB congeners with a  
51 2,3,6-chlorine substitution pattern, PCB 132 is axially chiral because it exists as two stable rotational  
52 isomers, or atropisomers, which are non-superimposable mirror images of each other (Lehmler et al.,  
53 2010). Importantly, chiral PCBs, including PCB 132, are present in human blood (DeCaprio et al., 2005;  
54 Jursa et al., 2006; Whitcomb et al., 2005), breast milk (Bordajandi et al., 2008; Bucheli and Brandli,  
55 2006; Glausch et al., 1995) and postmortem human tissue samples (Chu et al., 2003).

56 Exposure to PCBs has been implicated in the etiology of neurodevelopmental and  
57 neurodegenerative disorders (Hatcher-Martin et al., 2012; Jones and Miller, 2008; Pessah et al., 2010).  
58 In particular PCB congeners with two or more *ortho* chlorine substituents are neurotoxic and, for  
59 example, have been associated with behavioral and cognitive deficits in male mice (Caudle et al., 2006).  
60 Similarly, animal studies with hydroxylated PCB metabolites reported impairments in behavioral and  
61 locomotor activity in rats and mice (Hajjima et al., 2017; Lesmana et al., 2014). Mechanistic studies  
62 suggest that these PCBs and, most likely, their metabolites affect the dopaminergic system. In particular  
63 *ortho*-chlorinated PCBs inhibited dopamine uptake in rat synaptosomes (Mariussen and Fonnum, 2001)  
64 and decreased the dopamine content in cells in culture, possibly due to inhibition of dopamine synthesis  
65 (Seegal, 1996). 2,2',3,4',6-Pentachlorobiphenyl (PCB 91) and 2,2',3,5',6-pentachlorobiphenyl (PCB 95)  
66 decreased dopamine content in rat synaptosomes by inhibiting vesicular monoamine transporter  
67 (VMAT) (Bemis and Seegal, 2004). In contrast, PCB 95 increased intracellular dopamine and decreased

68 dopamine in medium by down-regulating VMAT2 expression in PC12 cells (Enayah et al., 2018).  
69 Striatal dopamine levels in male mice decreased due to a decrease in the expression of dopamine  
70 transporter (DAT) and VMAT2 (Richardson and Miller, 2004). Other studies suggest that, in addition to  
71 their effects on the dopaminergic system, PCB neurotoxicity can be mediated by altered intracellular  
72 Ca<sup>2+</sup> signaling and/or disruption of thyroid and sex hormone homeostasis (reviewed in (Kodavanti and  
73 Curras-Collazo, 2010; Mariussen and Fonnum, 2006; Pessah et al., 2010)).

74 PCBs are biotransformed to the corresponding hydroxylated metabolites in plants and animals,  
75 including humans (Grimm et al., 2015; Kania-Korwel and Lehmler, 2016a). Metabolism of PCBs  
76 depends on the number and position of chlorine substituents. Structure-metabolism relationships  
77 revealed that PCB congeners with H-atoms in vicinal *meta* and *para* positions are readily metabolized  
78 by cytochrome P450 (P450) enzymes, whereas congeners without adjacent *para* and *meta* positions are  
79 metabolized more slowly (Grimm et al., 2015). The oxidation of PCBs by P450 enzymes occurs either  
80 by direct insertion of an oxygen atom into an aromatic C-H bond or via an arene oxide intermediate  
81 (Forgue and Allen, 1982; Forgue et al., 1979; Preston et al., 1983). Several P450 isoforms, including  
82 CYP2A and CYP2B enzymes, are involved in the metabolism of *ortho* chlorinated PCB congeners, such  
83 as PCB 132, in different species (Lu et al., 2013; McGraw and Waller, 2006; Nagayoshi et al., 2018;  
84 Ohta et al., 2012; Waller et al., 1999; Warner et al., 2009). Hydroxylated and methylsulfone metabolites  
85 of PCB 132 have been detected in human blood, breast milk and feces (Haraguchi et al., 2004;  
86 Haraguchi et al., 2005). Similar to animal studies (Norstroem and Bergman, 2006), PCB 132 undergoes  
87 atropisomeric enrichment in humans (Bordajandi et al., 2008; Bucheli and Brandli, 2006; Chu et al.,  
88 2003; Glausch et al., 1995; Zheng et al., 2016). These non-racemic chiral signatures of PCB 132 are  
89 most likely due to the atropselective metabolism of racemic PCB 132 to hydroxylated and other  
90 metabolites by P450 enzymes.

91 Several biotransformation studies reveal species differences in the metabolism of PCBs to chiral  
92 hydroxylated metabolites (Kania-Korwel and Lehmler, 2016a); however, only a few studies of the

93 metabolism of PCBs in humans have been reported to date (Schnellmann et al., 1983; Uwimana et al.,  
94 2016, 2018; Wu et al., 2014). Because of the growing evidence that OH-PCB are present in the  
95 environment (Tehrani and Van Aken, 2014) and represent an environmental and human health concern  
96 (Grimm et al., 2015; Kania-Korwel and Lehmler, 2016a), the objective of this study was to investigate  
97 the atropselective metabolism of PCB 132 to OH-PCB metabolites by HLMs.

98

## 99 **2. Materials and Methods**

### 100 *2.1. Chemicals and materials*

101 Sources and purities of racemic PCB 132 (**Table S1**), PCB metabolite standards, chemicals and  
102 other reagents; information regarding the HLM preparations; and a description of the separation and  
103 characterization of PCB 132 atropisomers are presented in the Supplementary Material. Gas  
104 chromatograms and the corresponding mass spectrum of PCB 132 are shown in **Figs. S1** and **S2**. The  
105 chemical structures and abbreviations of OH-PCB 132 metabolites are shown in **Fig. 1**.

106

### 107 *2.2. Microsomal incubations*

108 The metabolism of PCB 132 was investigated in incubations containing sodium phosphate buffer  
109 (0.1 M, pH 7.4), magnesium chloride (3 mM), pooled human liver microsomes (pHLMs) or single  
110 donor HLMs (0.1 mg/mL), and NADPH (1 mM) as described previously (Kania-Korwel et al., 2011;  
111 Uwimana et al., 2017; Wu et al., 2011). Following a 5 min preincubation, PCB 132 (50  $\mu$ M in DMSO;  $\leq$   
112 0.5% v/v) was added to the incubation system (2 mL final volume). The mixtures were incubated for 10,  
113 30 or 120 min at 37°C. Incubations with (-)-PCB 132, (+)-PCB132 or racemic PCB 132 (50  $\mu$ M in  
114 DMSO;  $\leq$  0.5% v/v) were carried out analogously for 30 min at 37°C. The formation of PCB 132  
115 metabolites was linear with time for up to 30 min. To terminate the enzymatic reaction, ice-cold sodium  
116 hydroxide (2 mL, 0.5 M) was added to each sample and the incubation mixtures were heated at 110 °C  
117 for 10 min. Phosphate buffer blanks and control incubations without PCB accompanied each

118 microsomal preparation. To control for abiotic transformation of PCB 132, the following incubations  
119 were performed in parallel with each metabolism study: (1) without NADPH, (2) without microsomes,  
120 and (3) heat inactivated microsomes. No metabolites were detected in any of the control samples. If not  
121 stated otherwise, incubations with HLMs were performed in triplicate.

122

### 123 *2.3. Extraction of hydroxylated PCB 132 metabolites*

124 PCB 132 and its hydroxylated metabolites were extracted from the incubation mixtures as  
125 reported previously (Kania-Korwel et al., 2011; Uwimana et al., 2016; Wu et al., 2011). Briefly,  
126 samples were spiked with PCB 117 (200 ng) and 4'-159 (68.5 ng) as recovery standards. Hydrochloric  
127 acid (6 M, 1 mL) was added, followed by 2-propanol (5 mL). The samples were extracted with hexane-  
128 MTBE (1:1 v/v, 5 mL) and re-extracted with hexane (3 mL). The combined organic layers were washed  
129 with an aqueous potassium chloride solution (1%, 4 mL), the organic phase was transferred to a new  
130 vial, and the KCl mixture was re-extracted with hexane (3 mL). The combined organic layers were  
131 evaporated to dryness under a gentle stream of nitrogen. The samples were reconstituted with hexane (1  
132 mL), derivatized with diazomethane in diethyl ether (0.5 mL) for approximately 16 h at 4 °C (Kania-  
133 Korwel et al., 2008), and underwent sulfur and sulfuric acid clean-up steps prior to gas chromatographic  
134 analysis (Kania-Korwel et al., 2005; Kania-Korwel et al., 2007).

135

### 136 *2.4. Identification of PCB 132 metabolites*

137 High resolution gas chromatography with time-of-flight mass spectrometry (GC/TOF-MS) was  
138 used to confirm the identity of the hydroxylated metabolites formed in incubations of PCB 132 with  
139 pHLMs as described (Uwimana et al., 2016, 2018). To obtain metabolite levels sufficient for GC/TOF-  
140 MS analysis, incubations were performed using the following experimental conditions: 50 µM racemic  
141 PCB 132, 0.3 mg/mL microsomal protein and 1 mM NADPH for 90 min at 37 °C. Metabolites were  
142 extracted and derivatized as described above, and samples were analyzed on a Waters GCT Premier gas

143 chromatograph (Waters Corporation, Milford, MA, USA) combined with a time-of-flight mass  
144 spectrometer in the High-Resolution Mass Spectrometry Facility of the University of Iowa (Iowa City,  
145 IA, USA). Methylated PCB 132 metabolites were separated on a DB-5ms column (30 m length, 250  $\mu$ m  
146 inner diameter, 0.25  $\mu$ m film thickness; Agilent, Santa Clara, CA, USA). Details regarding the  
147 instrument parameters have been described previously (Uwimana et al., 2016, 2018). Analyses were  
148 carried out in the presence and in the absence of heptacosafuorotributylamine as internal standard (lock  
149 mass) to determine the accurate mass of  $[M]^+$  and obtain mass spectra of the metabolites, respectively.  
150 Metabolites were identified with the following criteria: The average relative retention times (RRT)  
151 ( $n=3$ ) of the metabolites, calculated relative to PCB 51 as internal standard, were within 0.5% of the  
152 RRT of the respective authentic standard (European Commission, 2002); experimental accurate mass  
153 determinations were within 0.003 Da of the theoretical mass of  $[M]^+$ ; and the isotope pattern of  $[M]^+$   
154 matched the theoretical abundance ratios of hexachlorinated biphenyl derivatives within a 20 % error.

155

### 156 *2.5. Quantification of PCB 132 metabolite levels*

157 Levels of OH-PCB 132 metabolites (as methylated derivatives) in extracts were quantified on an  
158 Agilent 7890A gas chromatograph with a  $^{63}\text{Ni}$ -micro electron capture detector ( $\mu$ ECD) and a SPB-1  
159 capillary column (60 m length, 250  $\mu$ m inner diameter, 0.25  $\mu$ m film thickness; Supelco, St Louis, MO,  
160 USA) as reported earlier (Uwimana et al., 2016; Uwimana et al., 2017; Wu et al., 2013b). PCB 204 was  
161 added as internal standard (volume corrector) prior to analysis, and concentrations of OH-PCB 132  
162 metabolites (as methylated derivatives) were determined using the internal standard method (Kania-  
163 Korwel et al., 2011; Wu and Lehmler, 2016; Wu et al., 2011). Levels of PCB and its metabolites were  
164 not adjusted for recovery to facilitate a comparison with earlier studies (Uwimana et al., 2016, 2018;  
165 Wu and Lehmler, 2016). The average RRTs of the metabolites, calculated relative to PCB 204, were  
166 within 0.5% of the RRT for the respective standard (European Commission, 2002). Metabolite levels

167 and formation rates for all experiments described in the manuscript are summarized in the  
168 Supplementary Material (**Tables S2-S4**).

169

## 170 *2.6. Ring opening calculations*

171 The ring opening reactions were modeled using density functional theory at the M11/def2-SVP  
172 level of theory (Peverati and Truhlar, 2011; Weigend and Ahlrichs, 2005), coupled with the SMD  
173 aqueous continuum solvation model (Marenich et al., 2009). The reactions were examined under neutral  
174 conditions, with two explicit water molecules complexed to the system to serve as a proton shuttle. To  
175 ascertain steric and electronic effects, calculations were carried out on epoxides formed from 1,2,4-  
176 trichlorobenzene (TCB), 1,2,4-trichlorobiphenyl (TCP), PCB 91, PCB 95, PCB 132, and PCB 136.  
177 Transition states were characterized by normal mode analysis and confirmed via IRC calculations. All  
178 calculations were performed using Gaussian 16, Rev. A.01 (Frisch et al., 2016). Additional details  
179 including computational data are available in the Supplementary Material.

180

## 181 *2.7. Atropselective analyses*

182 Atropselective analyses were carried out with extracts from long-term incubations (*i.e.*, 5 or 50  
183  $\mu$ M PCB 132, 120 minutes at 37 °C, 0.5 mg/mL protein, and 0.5 mM NADPH) and extracts from the 30  
184 min incubations described above. Hydroxylated metabolites were analyzed as methylated derivatives  
185 after derivatization with diazomethane. Analyses were performed on an Agilent 6890 gas  
186 chromatograph equipped with a  $\mu$ ECD detector and a CP-Chirasil-Dex CB (CD) (25 m length, 250  $\mu$ m  
187 inner diameter, 0.12  $\mu$ m film thickness; Agilent, Santa Clara, CA, USA) or a ChiralDex G-TA (GTA)  
188 capillary column (30 m length, 250  $\mu$ m inner diameter, 0.12  $\mu$ m film thickness; Supelco, St Louis, MO,  
189 USA) (Kania-Korwel et al., 2011; Uwimana et al., 2017). The following temperature program was use  
190 for the atropselective analysis of PCB 132 and 5'-132 on a CD column: initial temperature was 50 °C  
191 held for 1 min, ramped at 10 °C/min to 160 °C and held for 220 min, the temperature was then ramped



192 at 20 °C/min to the final temperature of 200 °C and held for 10 min. To analyze 3'-140 on a GTA  
193 column, the temperature program was as follows: initial temperature was 50 °C held for 1 min, ramped  
194 at 10 °C/min to 150 °C and held for 400 min, the temperature was then ramped at 10 °C/min to the final  
195 temperature of 180 °C and held for 40 min. The helium flow was 3 mL/min. To facilitate a comparison  
196 with earlier studies (Kania-Korwel and Lehmler, 2016b; Uwimana et al., 2016; Uwimana et al., 2017;  
197 Wu et al., 2011), enantiomeric fractions (EFs) were calculated by the drop valley method (Asher et al.,  
198 2009) as  $EF = \text{Area } E_1 / (\text{Area } E_1 + \text{Area } E_2)$ , where Area  $E_1$  and Area  $E_2$  denote the peak area of the first  
199 ( $E_1$ ) and second ( $E_2$ ) eluting atropisomer on the respective column. All EF values are summarized in the  
200 Supplementary Material (**Table S6**).

201

## 202 2.8. *Quality Assurance and Quality Control*

203 The response of the  $\mu$ ECDs used in this study was linear for all analytes up to concentrations of  
204 1,000 ng/mL ( $R^2 \geq 0.999$ ). The recoveries of PCB 117 were  $93 \pm 13\%$  ( $n = 120$ ). Recoveries of 4'-159  
205 could not be determined due to co-elution with 4',5'-132. The limits of detection (LOD) of the PCB 132  
206 metabolites were calculated from blank buffer samples as  $LOD = \text{mean of blank samples} + k * \text{standard}$   
207  $\text{deviation of blank samples}$ , where  $k$  is the student's  $t$  value for a degree of freedom  $n-1 = 5$  at 99%  
208 confidence level) (Kania-Korwel et al., 2011; Uwimana et al., 2016; Wu and Lehmler, 2016; Wu et al.,  
209 2011). The LODs were 0.03, 0.1 and 0.21 ng for 3'-140, 5'-132 and 4'-132, respectively. The  
210 background levels for 3'-140, 5'-132 and 4'-132 in control (DMSO) incubations with HLMs ( $n=6$ ) were  
211 0.17, 0.13 and 0.19 ng, respectively. The resolution of the atropisomers of PCB 132 and 5'-132 on the  
212 CD column was 1.05 and 2.02, respectively. The resolution of the atropisomers of 3'-140 on the GTA  
213 column was 1.18. The EF values of the racemic standards of PCB 132, 3'-140 and 5'-132 were  $0.51 \pm$   
214  $0.01$  ( $n=2$ ),  $0.50 \pm 0.01$  ( $n=3$ ) and  $0.49 \pm 0.01$  ( $n=3$ ), respectively. The data are presented as the mean  $\pm$   
215 standard deviation.

216

### 217 3. Results and discussion

#### 218 3.1. Identification and quantification of PCB 132 metabolites in incubations with pHLMs

219 Several human biomonitoring studies have reported an atropisomeric enrichment of PCB 132 in  
220 human samples (**Table S8**) (Lehmler et al., 2010); however, the atropselective oxidation of this PCB  
221 congener to hydroxylated metabolites by HLMs has not been studied to date (Grimm et al., 2015;  
222 Kania-Korwel and Lehmler, 2016a). Our GC/TOF-MS analyses revealed the formation of three  
223 monohydroxylated and one dihydroxylated PCB metabolite in incubations of racemic PCB 132 with  
224 pHLMs (**Fig. 2; Figs. S4-S11**). The structure of these metabolites is shown in the simplified metabolism  
225 scheme in **Fig. 1**. Their identification was based on accurate mass determinations, the chlorine isotope  
226 patterns of their molecular ion (analyzed as methylated derivatives) and their fragmentation patterns; for  
227 additional discussion, see the Supplementary Material. PCB 132 was oxidized by pooled and individual  
228 donor HLMs in the *meta* position, with 5'-132 and 3'-140, a 1,2-shift product, being major metabolites  
229 (**Figs. 3-4; Table S2**). 4'-132 was only a minor metabolite. 4',5'-132 could not be quantified in this study  
230 due to co-elution with the recovery standard, 4'-159; however, this metabolite was only a minor  
231 metabolite.

232 It is noteworthy that 3'-140, one of the major metabolites observed in all HLM preparations, is a  
233 1,2-shift product (Guroff et al., 1967) that is formed *via* an arene oxide intermediate, followed by a 1,2-  
234 shift of the 3'-chlorine substituent to the *para* position. In contrast, *in vitro* studies consistently show  
235 that 5'-132 is a major metabolite of PCB 132 in rodents. For example, 5'-132 was the major metabolite  
236 formed in experiments with rat liver microsomes (Kania-Korwel et al., 2011), recombinant rat CYP2B1  
237 (Lu et al., 2013), and precision-cut mouse liver tissue slices (Wu et al., 2013a). 1,2-Shift products are  
238 only minor metabolites of PCB 132 and other chiral PCBs in *in vitro* and *in vivo* studies in rodent  
239 models (Kania-Korwel et al., 2011; Lu et al., 2013; Wu et al., 2013a). Analogous to the structurally  
240 related PCB 52 (Preston et al., 1983), oxidation of the *meta* position of PCB 132 to 5'-132 by rat  
241 CYP2B1 is thought to occur via a direct insertion of an oxygen atom into an aromatic C-H bond.

242 Another important observation is that PCB 132 was oxidized by HLMs in the 2,3,6-trichloro  
243 substituted ring, whereas no oxidation was observed in the 2,3,4-chloro substituted ring. This  
244 observation is consistent with earlier reports that *ortho* substituted PCBs with a *para* chlorine  
245 substituent in one phenyl ring are preferentially oxidized by rat (Kennedy et al., 1981) and human  
246 enzymes (Uwimana et al., 2018) in the non-*para* substituted ring. Moreover, the oxidation of PCB 132  
247 in positions with vicinal H substituents in *meta-para* positions is consistent with published structure-  
248 metabolism relationships of PCBs (Kannan et al., 1995).

### 249 250 3.2. Congener specific metabolism of *ortho* substituted PCBs by HLMs

251 A comparison of the PCB 132 metabolite profiles formed by HLMs with the metabolite profiles  
252 of structurally related PCB congeners with a 2,3,6-trichlorophenyl group (*i.e.*, PCB 91, PCB 95 and  
253 2,2',3,3',6,6'-hexachlorobiphenyl [PCB 136]) reveals considerable congener-specific differences in the  
254 regioselectivity of the P450 enzyme-mediated oxidation of PCBs (**Fig. 4a**). In this study, PCB 132 was  
255 oxidized by HLMs in the *meta* position to yield the 1,2-shift product, 3'-140, and 5'-132. PCB 91, which  
256 is structurally similar to PCB 132, was also primarily metabolized to a 1,2-shift product by HLMs;  
257 however, the corresponding 5-91 metabolite was only a minor metabolites (Uwimana et al., 2018). In  
258 contrast to PCB 132 and PCB 91, PCB 95 was preferentially oxidized by HLMs in the *para* position  
259 with the lower chlorinated, 2,5-dichloro substituted phenyl ring, and only traces of a 1,2-shift product  
260 were formed by with different HLM preparations (Uwimana et al., 2016). PCB 136 was metabolized in  
261 both the *meta* and *para* position to yield comparable levels of 5'-136 and 4'-136, with ratios of 5'-136:  
262 4'-136 of 0.4 to 0.8:1 and 1.3:1 reported for different HLM preparations (Schnellmann et al., 1983; Wu  
263 et al., 2014).

264 To assess if congener-specific differences in OH-PCB metabolite profiles are due to different  
265 arene oxide intermediates and/or different substitution pattern in the second phenyl ring of chiral PCB  
266 congeners, the energetics of different arene oxide ring opening reactions were determined for 1,2,4-

267 trichlorobenzene, 2,3,6-trichlorobiphenyl, PCB 91, PCB 95, PCB 132, and PCB 136 (**Figs. 5 and S12,**  
268 **Table S5**). The 3,4-, 4,5-, and 5,6-arene oxides of PCB 132 and PCB 136 were found to be essentially  
269 isoenergetic, lying within  $\pm 2$  kcal/mol of each other. Differences due to atropisomerism are also  
270 negligible within  $\pm 1$  kcal/mol. Therefore, in the absence of a chiral environment, we predict no inherent  
271 factors to favor the formation of an arene oxide regioisomer or arene oxide atropisomer over another.  
272 Only the 3,4-arene oxides were explored for the other compounds.

273 Complete ring-opening pathways were computed for the 3,4-, 4,5-, and 5,6-arene oxides for a  
274 single atropisomer of PCB 132. In addition, the ring opening pathways were investigated for PCB 136, a  
275 well-investigated chiral PCB congener. As each epoxide may open either of two directions, six  
276 pathways were computed for PCB 132 and PCB 136. In the case of the 3,4- (and 5,6-) arene oxide, the  
277 arene oxide opening towards the C-Cl group and the 1,2-shift of the chlorine were concerted, with  
278 barriers to opening of approximately 25 kcal/mol (**Fig. S12**). The proton transfer step to form the phenol  
279 and restore aromaticity proceeded with a negligible barrier and was essentially spontaneous.

280 In contrast, when the 3,4- (and 5,6-) arene oxides open towards the aromatic C-H bond, the  
281 energy barrier to arene oxide opening was approximately 40 kcal/mol for both arene oxides (**Fig. 5**).  
282 For both the 3,4- and 5,6-arene oxides, this mode of opening leads to formation of the 4,5-arene oxide as  
283 confirmed by IRC calculations. Therefore, ring opening of the 4,5-arene oxides was also modeled. As  
284 both possible openings of the 4,5-arene oxide proceed towards C-H, it is not surprising that the barriers  
285 were found to also be approximately 40 kcal/mol. Here, IRC calculations do reveal concerted 1,2-  
286 hydride shifts analogous to the 1,2-chloride shift observed for 3,4-arene oxide opening toward C-Cl.

287 Partial pathways opening toward C-Cl were explored for the 3,4-arene oxides of 1,2,4-  
288 trichlorobenzene, 2,3,6-trichlorobiphenyl, PCB 91 and PCB 95. The presence or absence of the  
289 substituent aryl ring had no effect on the computed mechanism or energetics for opening toward C-Cl,  
290 nor did the substitution pattern on the aryl substituent. For 1,2,4-trichlorobenzene, ring opening in the  
291 C-H direction was also modeled. It was found that the 3,4-arene oxide to 4,5-arene oxide rearrangement

292 mentioned above does not exist for 1,2,4-trichlorobenzene. Instead, a 1,2-hydride shift is predicted.

293 However, the energetics are not affected by this variation in the mechanism.

294 We therefore conclude that the presence of the second aromatic ring does not perturb the  
295 energetics relative to the simplest case, 1,2,4-trichlorobenzene, an observation that applies to all PCB  
296 congeners of interest (**Table S5**). This is in contrast to computational results reported by Kaminsky et al.  
297 on dichlorobiphenyls (Kaminsky et al., 1981). However, their results relied on constrained optimizations  
298 at the semiempirical MNDO level of theory and cannot be considered reliable by current standards.  
299 Nevertheless, we do find agreement that the 3,4-arene oxide is the most likely intermediate leading to  
300 major products. Thus, we conclude that the 1,2-chloride shift products, major metabolites of both PCB  
301 132 (this study) and PCB 91 (Uwimana et al., 2018), are formed via an 3,4-arene oxide intermediate  
302 which opens toward C-Cl, with no significant influence from the second aromatic ring. The absence of  
303 an *ortho* substituted 1,2-shift product in incubations of PCB 132 and other chiral PCBs with HLMs  
304 suggests that the corresponding 5,6-arene oxides are probably not formed by human P450 enzymes. The  
305 present study also indicates that the formation of *para* substituted metabolites of PCB 95 and PCB 136  
306 is not simply due to the energetically favored opening of an arene oxide intermediate. Instead, congener  
307 specific differences in the steric or electronic interaction of chiral PCBs, such as PCB 132, with specific  
308 P450 isoforms likely affect the rearrangement of the arene oxide intermediates to OH-PCBs.

### 309 310 *3.3. Inter-individual differences in PCB 132 metabolism by HLMs*

311 In experiments with single donor HLMs, the formation rates of the monohydroxylated PCB 132  
312 metabolites displayed inter-individual variation (**Figs. 3 and 4b; Tables S3 and S4**). This is not  
313 surprising considering the well documented variability of P450 enzyme activities among humans  
314 (Guengerich, 2015). The sum of OH-PCBs ( $\Sigma$ OH-PCBs) formed by single donor HLM preparations  
315 followed the following rank order: donor H5 > H4 ~ H3 > H2 ~ pHLM > H1. Notably, levels of  $\Sigma$ OH-  
316 PCB were 4.5-fold higher in incubations with HLMs from donors H5 vs. H1. The rate of 5'-132

317 formation differed 16-fold for incubations with HLM preparations from donors H1 vs. H4. The rate of  
318 3'-140 and 4'-132 formation differed 2.2 and 3.3-fold, respectively, for incubations with HLM  
319 preparations from donors H1 vs. H5. As a consequence, the OH-PCB metabolite profiles differed across  
320 the HLM preparations investigated (**Fig. 4b**). Briefly, 3'-140 and 5'-132 were formed in a 1:1 ratio by  
321 pHLMs. In incubations with HLMs from donors H1 and H2, the 3'-140 to 5'-132 ratios were 3.9:1 and  
322 1.4:1 for donors H1 and H2, respectively. In contrast, 5'-132, and not 3'-140, were major in incubations  
323 with HLMs from donors H3, H4 and H5 (3'-140 to 5'-132 ratios were 0.7:1, 0.3:1 and 0.6:1 for donors  
324 H3, H4 and H5, respectively). Although only a small number of single donor HLM preparations were  
325 investigated in this and other studies, the profiles of OH-PCB metabolite formed in the liver likely  
326 display considerable variability in humans.

327

#### 328 *3.4. Atropisomeric enrichment of PCB 132*

329 Because chiral PCBs affect toxic endpoints in an atropselective manner, the enrichment of PCB  
330 132 atropisomers in incubations of racemic PCB 132 with HLMs was investigated with atropselective  
331 gas chromatography. E<sub>2</sub>-PCB 132 (EF = 0.39), which corresponds to (+)-PCB 132 (Haglund and  
332 Wiberg, 1996), was enriched in experiments with low PCB 132 concentration (5 μM) and long  
333 incubation time (120 min) (**Fig. 6, Table S6**). EF values were near racemic in incubations with higher  
334 PCB 132 concentrations (50 μM) because the large amount of racemic PCB 132 masked the  
335 atropselective depletion of one PCB 132 atropisomer over the other (Uwimana et al., 2016, 2018).  
336 Several small human biomonitoring studies also observed an enrichment of (+)-PCB 132 in human  
337 tissues and biospecimen samples, with EF values of PCB 132 ranging from 0.18 to 0.48 in breast milk  
338 and 0.32 to 0.49 in liver (**Table S8**). A single brain tissue sample from Belgium showed an enrichment  
339 of (-)-PCB 132 (Chu et al., 2003). PCB 132 was racemic in human hair (Zheng et al., 2013; Zheng et al.,  
340 2016), but displayed an enrichment of (-)-PCB 132 (EF = 0.55 ± 0.06) in serum from Chinese e-waste  
341 recycling workers (Zheng et al., 2016).

342 In animal studies, (+)-PCB 132 was enriched in female mice (Kania-Korwel et al., 2010;  
343 Milanowski et al., 2010), male Wistar rats (Norstrom et al., 2006), bivalves (Wong et al., 2001) and  
344 plants *in vivo* (Chen et al., 2014). (-)-PCB 132 had a shorter half-life in a disposition study in mice  
345 (Kania-Korwel et al., 2010). (+)-PCB 132 was also enriched in *in vitro* metabolism studies with  
346 precision-cut mouse liver tissue slices (Wu et al., 2013a), rat liver microsomes (Kania-Korwel et al.,  
347 2011), and recombinant rat CYP2B1 and human CYP2B6 (Lu et al., 2013; Warner et al., 2009). Active  
348 transporters, such as Mdr1a/b, did not contribute to the atropisomeric enrichment of chiral PCBs, such  
349 as PCB 132, in mice (Milanowski et al., 2010). Taken together, the enrichment of PCB atropisomers  
350 observed in *in vitro* studies appears to predict the atropisomeric enrichment observed in animal studies.  
351 Analogously, our findings strongly suggest that the enrichment of (+)-PCB 132 observed in most human  
352 samples (**Table S8**) is due to the preferential biotransformation of (-)-PCB 132 to OH-PCBs and other  
353 metabolites. In addition, exposure to atropisomerically enriched PCB 132 *via* the diet may also  
354 contribute to the atropisomeric enrichment of PCB 132 in humans (Harrad et al., 2006; Vetter, 2016).  
355 Because our study was not designed to quantify levels of PCB 132 metabolites formed *via* arene oxide  
356 intermediates, additional studies are needed to demonstrate that *in vitro* metabolism studies are indeed  
357 predictive of chiral signatures of PCB 132 in human samples.

358

### 359 3.5. Atropselective formation of OH-PCB 132 metabolites

360 Several studies have reported the atropselective formation of chiral OH-PCB metabolites, both  
361 from chiral and prochiral PCBs, in *in vitro* and *in vivo* studies (Kania-Korwel and Lehmler, 2016a;  
362 Lehmler et al., 2010; Uwimana et al., 2017). Consistent with these earlier studies, we observed the  
363 atropselective formation of different OH-PCB 132 metabolites in incubations with HLMS. Specifically,  
364 the atropselective analysis on the GTA column revealed the atropselective formation of E<sub>1</sub>-3'-140, with  
365 EF values > 0.8 (range: 0.84 to 0.95) (**Figs. 6-7**). E<sub>1</sub>-3'-140 was also enriched in experiments with rat  
366 liver microsomes (Kania-Korwel et al., 2011). E<sub>2</sub>-5'-132 was significantly enriched with EF values < 0.2



367 (range: 0.12 to 0.18) in incubations with HLMs. Similarly, metabolism of racemic PCB 132 resulted in  
368 an enrichment of E<sub>2</sub>-5'-132 in incubations with rat liver microsomes (Kania-Korwel et al., 2011) and  
369 mouse live tissue slices (Wu et al., 2013a). In contrast, rat CYP2B1 metabolized PCB 132 preferentially  
370 to E<sub>1</sub>-5'-132, which indicates the involvement of other P450 isoforms in the atropselective oxidation of  
371 PCB 132 in incubations with rat liver microsomes (Lu et al., 2013). As reported previously, the  
372 atropisomers of 4-132 could not be resolved on any of the chiral columns used (Kania-Korwel et al.,  
373 2011).

374 To determine which of E<sub>1</sub>-OH-PCB and E<sub>2</sub>-OH-PCB atropisomer is formed from (-)- or (+)-PCB  
375 132, we investigated the metabolism of (-)-, (±)-, and (+)-PCB 132 by pHLMs (**Fig. 8, Table S7**). The  
376 atropselective analysis showed that E<sub>1</sub>-5'-132 is formed from (+)-PCB 132. Conversely, E<sub>1</sub>-3'-140 and  
377 E<sub>2</sub>-5'-132 are formed from (-)-PCB 132. The ΣOH-PCBs formed from (-)-PCB 132 was 3-times the  
378 ΣOH-PCBs formed from (+)-PCB 132 (**Table S7**). A more complex picture emerges when individual  
379 OH-PCB 132 metabolites are analyzed (**Figs. 8e-g**). The levels of both major metabolites, 3'-140 and 5'-  
380 132, decreased in the order of (-)-PCB 132 > (±)-PCB 132 > (+)-PCB 132. In contrast, levels of the  
381 minor metabolite, 4'-132, decreased in the reverse order. As a consequence, the OH-PCB 132 metabolite  
382 profiles formed by HLMs differ considerably for incubations with (-)-, (±)-, and (+)-PCB 132 (**Fig. 8h**).  
383 Overall, the faster metabolism of (-)-PCB 132 to OH-PCBs is consistent with the enrichment of (+)-  
384 PCB 132 in incubations of racemic PCB 132 with pHLMs (**Fig. 6a2**) and the enrichment of (+)-PCB  
385 132 in most human tissue samples (**Table S8**). Consistent with our results, levels of methyl sulfone  
386 metabolites of PCB 132 were higher in rats exposed to (-)-PCB 132 compared to rats exposed to (+)-  
387 PCB 132, suggesting that (-)-PCB 132 is more rapidly metabolized in rats (Norstrom et al., 2006).

388

### 389 *3.6. Implications for ecosystem and environmental health*

390 Biotransformation of chiral PCBs results in non-racemic chiral signatures of parent PCBs and  
391 their metabolites in environmental samples, including wildlife, livestock, plants and humans (Kania-



392 Korwel and Lehmler, 2016b; Lehmler et al., 2010). The atropisomeric enrichment of chiral PCBs and  
393 chiral metabolites is concerning because chiral PCBs may have atropselective toxic effect. Several  
394 studies show atropselective biological effects of pure PCBs atropisomers. PCB atropisomers have  
395 different effects on the expression and activity of xenobiotic processing genes (Parkinson et al., 1983;  
396 Pencikova et al., 2018; Safe et al., 1985). For example, chiral PCBs atropselectively induce P450  
397 enzymes, with penta- and hexachlorinated PCBs being more active than octachlorinated PCBs in rats  
398 (Püttmann et al., 1990; Püttmann et al., 1989) and in chick hepatocyte cultures (Rodman et al., 1991),  
399 most likely due to atropselective interaction with nuclear receptors, such as pregnane X receptor (PXR)  
400 and constitutive androstane receptor (CAR), that regulate the expression of hepatic P450 enzymes  
401 (Gährs et al., 2013). In the human HepaRG cell line, (-)-PCB 136 activated PXR and CAR to a greater  
402 extent than (+)-PCB 136, as inferred from the atropselective induction of the expression of CYP2B6 and  
403 CYP3A4 (Pencikova et al., 2018).

404 Chiral PCBs also affect endpoints implicated in PCB developmental neurotoxicity in an  
405 atropselective manner. For example (-)-PCB136, but not (+)-PCB 136 is a potent sensitizer of ryanodine  
406 receptors (RyRs) and affects dendritic growth and neuronal connectivity via a calcium-dependent  
407 mechanism involving RyRs (Yang et al., 2014). Similarly, (-)-PCB 95 showed greater RyR1 binding  
408 and an increased rate of calcium efflux relative to (+)-PCB 95 in skeletal muscle (Feng et al., 2017). In  
409 the same study, (+)-PCB 95 had a slightly stronger effect on mixtures of RyRs present in the brain and  
410 hippocampal neuronal networks than (+)-PCB 95. Interestingly, racemic PCB 95 showed a greater  
411 effect on these endpoints than pure PCB 95 atropisomers. (-)-PCB 84 increased the [<sup>3</sup>H]-phorbol ester  
412 binding in rat cerebellar granule cell; however, (-)-PCB 84 and (+)-PCB 84 similarly inhibited uptake of  
413 <sup>45</sup>Ca<sup>2+</sup> by microsomes isolated from adult rat cerebellum (Lehmler et al., 2005). (+)-PCB 136 showed  
414 significant estrogenic activity toward estrogen receptor (ER), whereas (-)-PCB 136 displayed anti-  
415 estrogenic activity (Pencikova et al., 2018). A recent *in vivo* study showed that PCB 91 stereoselectively  
416 induced oxidative stress in adult zebrafish (Chai et al., 2016). While limited, these studies demonstrate

417 that the atropisomeric enrichment of neurotoxic PCBs in the environment, wildlife and humans likely  
418 has toxicological implications that warrant further investigation.

419 Like the parent PCBs, OH-PCBs are present in rain and snow, sludge, atmosphere, sediment and  
420 soil (Kania-Korwel and Lehmler, 2016a; Tehrani and Van Aken, 2014). They are formed by oxidative  
421 processes in living organisms and have been detected in wildlife, including mammals, fish and  
422 invertebrates, and in plants (Kania-Korwel and Lehmler, 2016a; Tehrani and Van Aken, 2014). *In vitro*  
423 metabolism and animal studies demonstrate that chiral OH-PCBs are formed atropselectively in a  
424 congener and species-dependent manner from chiral and prochiral PCB congeners. Chiral OH-PCBs are  
425 present in the developing brain of mice exposed developmentally to racemic PCBs (Kania-Korwel et al.,  
426 2017); however, the levels, profiles and chiral signatures of these chiral PCB metabolites in the human  
427 brain have not been reported to date (Vetter, 2016). Because the position of the OH-group has a  
428 profound effect on the interaction of OH-PCBs with cellular targets implicated in PCB neurotoxicity  
429 (Kodavanti et al., 2003; Niknam et al., 2013), further studies are needed to determine how differences in  
430 OH-PCB metabolite profiles affect neurotoxic outcomes in humans.

431

## 432 **Acknowledgments**

433 We thank Drs. S. Joshi, S. Vyas and Y. Song (University of Iowa) for synthesizing the PCB  
434 standards and Mr. V. Parcel from the University of Iowa HRMS Facility for help with the GC/TOF-MS  
435 analyses.

436

## 437 **Funding**

438 This work was supported by the National Institute of Environmental Health Sciences/National  
439 Institutes of Health [grant numbers ES05605, ES013661 and ES027169 to HLJ] and the National  
440 Science Foundation [CHE-1609669, CHE-1229354 to the MERCURY consortium  
441 (<http://mercuryconsortium.org/>) and CHE-1662030 to EVP]. The content of the manuscript is solely the

442 responsibility of the authors and does not necessarily represent the official views of the National  
443 Institute of Environmental Health Sciences or the National Institutes of Health.  
444

445 **References**

- 446 Asher, B.J., D'Agostino, L.A., Way, J.D., Wong, C.S., Harynuk, J.J., 2009. Comparison of peak  
447 integration methods for the determination of enantiomeric fraction in environmental samples.  
448 *Chemosphere* 75, 1042-1048.
- 449 Bemis, J.C., Seegal, R.F., 2004. PCB-induced inhibition of the vesicular monoamine transporter  
450 predicts reductions in synaptosomal dopamine content. *Toxicol. Sci.* 80, 288-295.
- 451 Bordajandi, L.R., Abad, E., Gonzalez, M.J., 2008. Occurrence of PCBs, PCDD/Fs, PBDEs and DDTs in  
452 Spanish breast milk: enantiomeric fraction of chiral PCBs. *Chemosphere* 70, 567-575.
- 453 Bucheli, T.D., Brandli, R.C., 2006. Two-dimensional gas chromatography coupled to triple quadrupole  
454 mass spectrometry for the unambiguous determination of atropisomeric polychlorinated biphenyls in  
455 environmental samples. *J. Chromatogr. A* 1110, 156-164.
- 456 Caudle, W.M., Richardson, J.R., Delea, K.C., Guillot, T.S., Wang, M., Pennell, K.D., Miller, G.W.,  
457 2006. Polychlorinated biphenyl-induced reduction of dopamine transporter expression as a  
458 precursor to Parkinson's disease-associated dopamine toxicity. *Toxicol. Sci.* 92, 490-499.
- 459 Chai, T., Cui, F., Mu, X., Yang, Y., Qi, S., Zhu, L., Wang, C., Qiu, J., 2016. Stereoselective induction  
460 by 2,2',3,4',6-pentachlorobiphenyl in adult zebrafish (*Danio rerio*): Implication of chirality in  
461 oxidative stress and bioaccumulation. *Environ. Pollut.* 215, 66-76.
- 462 Chen, S.J., Tian, M., Zheng, J., Zhu, Z.C., Luo, Y., Luo, X.J., Mai, B.X., 2014. Elevated levels of  
463 polychlorinated biphenyls in plants, air, and soils at an E-waste site in Southern China and  
464 enantioselective biotransformation of chiral PCBs in plants. *Environ. Sci. Technol.* 48, 3847-3855.
- 465 Chu, S., Covaci, A., Schepens, P., 2003. Levels and chiral signatures of persistent organochlorine  
466 pollutants in human tissues from Belgium. *Environ. Res.* 93, 167-176.
- 467 European Commission, 2002. Commission decision EC 2002/657 of 12 August 2002 implementing  
468 Council Directive 96/23/EC concerning the performance of analytical methods and the interpretation  
469 of results, Off. J. Eur. Communities: Legis.

- 470 DeCaprio, A.P., Johnson, G.W., Tarbell, A.M., Carpenter, D.O., Chiarenzelli, J.R., Morse, G.S.,  
471 Santiago-Rivera, A.L., Schymura, M.J., Akwesasne Task Force on the Environment, 2005.  
472 Polychlorinated biphenyl (PCB) exposure assessment by multivariate statistical analysis of serum  
473 congener profiles in an adult Native American population. *Environ. Res.* 98, 284-302.
- 474 Enayah, S.H., Vanle, B.C., Fuortes, L.J., Doorn, J.A., Ludewig, G., 2018. PCB95 and PCB153 change  
475 dopamine levels and turn-over in PC12 cells. *Toxicology* 394, 93-101.
- 476 Feng, W., Zheng, J., Robin, G., Dong, Y., Ichikawa, M., Inoue, Y., Mori, T., Nakano, T., Pessah, I.N.,  
477 2017. Enantioselectivity of 2,2',3,5',6-pentachlorobiphenyl (PCB 95) atropisomers toward ryanodine  
478 receptors (RyRs) and their influences on hippocampal neuronal networks. *Environ. Sci. Technol.* 51,  
479 14406-14416.
- 480 Forgue, S.T., Allen, J.R., 1982. Identification of an arene oxide metabolite of 2,2',5,5'-  
481 tetrachlorobiphenyl by gas chromatography-mass spectroscopy. *Chem. Biol. Interact.* 40, 233-245.
- 482 Forgue, S.T., Preston, B.D., Hargraves, W.A., Reich, I.L., Allen, J.R., 1979. Direct evidence that an  
483 arene oxide is a metabolic intermediate of 2,2',5,5'-tetrachlorobiphenyl. *Biochem. Biophys. Res.*  
484 *Commun.* 91, 475-483.
- 485 Frisch, M.J., Trucks, G.W., Schlegel, H.B., Scuseria, G.E., Robb, M.A., Cheeseman, J.R., Scalmani, G.,  
486 Barone, V., Petersson, G.A., Nakatsuji, H., Li, X., Caricato, M., Marenich, A.V., Bloino, J., Janesko,  
487 B.G., Gomperts, R., Mennucci, B., Hratchian, H.P., Ortiz, J.V., Izmaylov, A.F., Sonnenberg, J.L.,  
488 Williams-Young, D., Ding, F., Lipparini, F., Egidi, F., Goings, J., Peng, B., Petrone, A., Henderson,  
489 T., Ranasinghe, D., Zakrzewski, V.G., Gao, J., Rega, N., Zheng, G., Liang, W., Hada, M., Ehara,  
490 M., Toyota, K., Fukuda, R., Hasegawa, J., Ishida, M., Nakajima, T., Honda, Y., Kitao, O., Nakai, H.,  
491 Vreven, T., Throssell, K., Montgomery, J.A., Jr., Peralta, J.E., Ogliaro, F., Bearpark, M.J., Heyd,  
492 J.J., Brothers, E.N., Kudin, K.N., Staroverov, V.N., Keith, T.A., Kobayashi, R., Normand, J.,  
493 Raghavachari, K., Rendell, A.P., Burant, J.C., Iyengar, S.S., Tomasi, J., Cossi, M., Millam, J.M.,

494 Klene, M., Adamo, C., Cammi, R., Ochterski, J.W., Martin, R.L., Morokuma, K., Farkas, O.,  
495 Foresman, J.B., Fox, D.J., 2016. Gaussian 16, revision A. 03. Gaussian Inc., Wallingford, CT.

496 Gähns, M., Roos, R., Andersson, P.L., Schrenk, D., 2013. Role of the nuclear xenobiotic receptors CAR  
497 and PXR in induction of cytochromes P450 by non-dioxinlike polychlorinated biphenyls in cultured  
498 rat hepatocytes. *Toxicol. Appl. Pharmacol.* 272, 77-85.

499 Glausch, A., Hahn, J., Schurig, V., 1995. Enantioselective determination of chiral 2,2',3,3',4,6'-  
500 hexachlorobiphenyl (PCB 132) in human milk samples by multidimensional gas  
501 chromatography/electron capture detection and by mass spectrometry. *Chemosphere* 30, 2079-2085.

502 Grimm, F.A., Hu, D., Kania-Korwel, I., Lehmler, H.J., Ludewig, G., Hornbuckle, K.C., Duffel, M.W.,  
503 Bergman, A., Robertson, L.W., 2015. Metabolism and metabolites of polychlorinated biphenyls.  
504 *Crit. Rev. Toxicol.* 45, 245-272.

505 Guengerich, F.P., 2015. Human cytochrome P450 enzymes, in: Ortiz de Montellano, P.R. (Ed.),  
506 *Cytochrome P450*. Springer International Publishing, Cham, pp. 523-785.

507 Guroff, G., Daly, J.W., Jerina, D.M., Renson, J., Witkop, B., Udenfriend, S., 1967. Hydroxylation-  
508 induced migration: the NIH shift. Recent experiments reveal an unexpected and general result of  
509 enzymatic hydroxylation of aromatic compounds. *Science* 157, 1524-1530.

510 Haglund, P., Wiberg, K., 1996. Determination of the gas chromatographic elution sequences of the (+)  
511 and (-) enantiomers of stable enantiomeric PCBs on Chirasil-Dex. *J. High Resol. Chromatogr.* 19,  
512 373-376.

513 Haijima, A., Lesmana, R., Shimokawa, N., Amano, I., Takatsuru, Y., Koibuchi, N., 2017. Differential  
514 neurotoxic effects of in utero and lactational exposure to hydroxylated polychlorinated biphenyl  
515 (OH-PCB 106) on spontaneous locomotor activity and motor coordination in young adult male  
516 mice. *J. Toxicol. Sci.* 42, 407-416.

- 517 Haraguchi, K., Kato, Y., Koga, N., Degawa, M., 2004. Metabolism of polychlorinated biphenyls by  
518 Gunn rats: Identification and serum retention of catechol metabolites. *Chem. Res. Toxicol.* 17, 1684-  
519 1691.
- 520 Haraguchi, K., Koga, N., Kato, Y., 2005. Comparative metabolism of polychlorinated biphenyls and  
521 tissue distribution of persistent metabolites in rats, hamsters, and Guinea pigs. *Drug Metab. Dispos.*  
522 33, 373-380.
- 523 Harrad, S., Ren, J., Hazrati, S., Robson, M., 2006. Chiral signatures of PCB#s 95 and 149 in indoor air,  
524 grass, duplicate diets and human faeces. *Chemosphere* 63, 1368-1376.
- 525 Hatcher-Martin, J.M., Gearing, M., Steenland, K., Levey, A.I., Miller, G.W., Pennell, K.D., 2012.  
526 Association between polychlorinated biphenyls and Parkinson's disease neuropathology.  
527 *Neurotoxicology* 33, 1298-1304.
- 528 Herrick, R.F., Stewart, J.H., Allen, J.G., 2016. Review of PCBs in US schools: a brief history, an  
529 estimate of the number of impacted schools, and an approach for evaluating indoor air samples.  
530 *Environ. Sci. Pollut. Res. Int.* 23, 1975-1985.
- 531 Jones, D.C., Miller, G.W., 2008. The effects of environmental neurotoxicants on the dopaminergic  
532 system: a possible role in drug addiction. *Biochem. Pharmacol.* 76, 569-581.
- 533 Jursa, S., Chovancova, J., Petrik, J., Loksa, J., 2006. Dioxin-like and non-dioxin-like PCBs in human  
534 serum of Slovak population. *Chemosphere* 64, 686-691.
- 535 Kaminsky, L.S., Kennedy, M.W., Adams, S.M., Guengerich, F.P., 1981. Metabolism of  
536 dichlorobiphenyls by highly purified isozymes of rat liver cytochrome P-450. *Biochemistry* 20,  
537 7379-7384.
- 538 Kania-Korwel, I., Duffel, M.W., Lehmler, H.J., 2011. Gas chromatographic analysis with chiral  
539 cyclodextrin phases reveals the enantioselective formation of hydroxylated polychlorinated  
540 biphenyls by rat liver microsomes. *Environ. Sci. Technol.* 45, 9590-9596.

- 541 Kania-Korwel, I., El-Komy, M.H., Veng-Pedersen, P., Lehmler, H.J., 2010. Clearance of  
542 polychlorinated biphenyl atropisomers is enantioselective in female C57Bl/6 mice. *Environ. Sci.*  
543 *Technol.* 44, 2828-2835.
- 544 Kania-Korwel, I., Hornbuckle, K.C., Peck, A., Ludewig, G., Robertson, L.W., Sulkowski, W.W.,  
545 Espandiari, P., Gairola, C.G., Lehmler, H.J., 2005. Congener-specific tissue distribution of Aroclor  
546 1254 and a highly chlorinated environmental PCB mixture in rats. *Environ. Sci. Technol.* 39, 3513-  
547 3520.
- 548 Kania-Korwel, I., Lehmler, H.J., 2016a. Chiral polychlorinated biphenyls: absorption, metabolism and  
549 excretion--a review. *Environ. Sci. Pollut. Res. Int.* 23, 2042-2057.
- 550 Kania-Korwel, I., Lehmler, H.J., 2016b. Toxicokinetics of chiral polychlorinated biphenyls across  
551 different species--a review. *Environ. Sci. Pollut. Res. Int.* 23, 2058-2080.
- 552 Kania-Korwel, I., Lukasiewicz, T., Barnhart, C.D., Stamou, M., Chung, H., Kelly, K.M., Bandiera, S.,  
553 Lein, P.J., Lehmler, H.J., 2017. Editor's highlight: Congener-specific disposition of chiral  
554 polychlorinated biphenyls in lactating mice and their offspring: implications for PCB developmental  
555 neurotoxicity. *Toxicol. Sci.* 158, 101-115.
- 556 Kania-Korwel, I., Shaikh, N.S., Hornbuckle, K.C., Robertson, L.W., Lehmler, H.J., 2007.  
557 Enantioselective disposition of PCB 136 (2,2',3,3',6,6'-hexachlorobiphenyl) in C57BL/6 mice after  
558 oral and intraperitoneal administration. *Chirality* 19, 56-66.
- 559 Kania-Korwel, I., Zhao, H., Norstrom, K., Li, X., Hornbuckle, K.C., Lehmler, H.J., 2008. Simultaneous  
560 extraction and clean-up of polychlorinated biphenyls and their metabolites from small tissue samples  
561 using pressurized liquid extraction. *J. Chromatogr. A* 1214, 37-46.
- 562 Kannan, N., Reusch, T.B., Schulz-Bull, D.E., Petrick, G., Duinker, J.C., 1995. Chlorobiphenyls: model  
563 compounds for metabolism in food chain organisms and their potential use as ecotoxicological stress  
564 indicators by application of the metabolic slope concept. *Environ. Sci. Technol.* 29, 1851-1859.



- 565 Kennedy, M.W., Carpentier, N.K., Dymerski, P.P., Kaminsky, L.S., 1981. Metabolism of  
566 dichlorobiphenyls by hepatic microsomal cytochrome P-450. *Biochem. Pharmacol.* 30, 577-588.
- 567 Kodavanti, P.R., Curras-Collazo, M.C., 2010. Neuroendocrine actions of organohalogenes: thyroid  
568 hormones, arginine vasopressin, and neuroplasticity. *Front. Neuroendocrinol.* 31, 479-496.
- 569 Kodavanti, P.R., Ward, T.R., Derr-Yellin, E.C., McKinney, J.D., Tilson, H.A., 2003. Increased  
570 [<sup>3</sup>H]Phorbol Ester Binding in Rat Cerebellar Granule Cells and Inhibition of <sup>45</sup>Ca<sup>2+</sup> Buffering in Rat  
571 Cerebellum by Hydroxylated Polychlorinated Biphenyls. *Neurotoxicology* 24, 187-198.
- 572 Lehmler, H.J., Harrad, S.J., Huhnerfuss, H., Kania-Korwel, I., Lee, C.M., Lu, Z., Wong, C.S., 2010.  
573 Chiral polychlorinated biphenyl transport, metabolism, and distribution: a review. *Environ. Sci.*  
574 *Technol.* 44, 2757-2766.
- 575 Lehmler, H.J., Robertson, L.W., Garrison, A.W., Kodavanti, P.R., 2005. Effects of PCB 84 enantiomers  
576 on [<sup>3</sup>H]-phorbol ester binding in rat cerebellar granule cells and <sup>45</sup>Ca<sup>2+</sup>-uptake in rat cerebellum.  
577 *Toxicol. Lett.* 156, 391-400.
- 578 Lesmana, R., Shimokawa, N., Takatsuru, Y., Iwasaki, T., Koibuchi, N., 2014. Lactational exposure to  
579 hydroxylated polychlorinated biphenyl (OH-PCB 106) causes hyperactivity in male rat pups by  
580 aberrant increase in dopamine and its receptor. *Environ. Toxicol.* 29, 876-883.
- 581 Lu, Z., Kania-Korwel, I., Lehmler, H.-J., Wong, C.S., 2013. Stereoselective formation of mono- and di-  
582 hydroxylated polychlorinated biphenyls by rat cytochrome P450 2B1. *Environ. Sci. Technol.* 47,  
583 12184-12192.
- 584 Marenich, A.V., Cramer, C.J., Truhlar, D.G., 2009. Performance of SM6, SM8, and SMD on the  
585 SAMPL1 test set for the prediction of small-molecule solvation free energies. *J. Phys. Chem. B* 113,  
586 4538-4543.
- 587 Mariussen, E., Fonnum, F., 2001. The effect of polychlorinated biphenyls on the high affinity uptake of  
588 the neurotransmitters, dopamine, serotonin, glutamate and GABA, into rat brain synaptosomes.  
589 *Toxicology* 159, 11-21.

- 590 Mariussen, E., Fonnum, F., 2006. Neurochemical targets and behavioral effects of organohalogen  
591 compounds: an update. *Crit. Rev. Toxicol.* 36, 253-289.
- 592 McGraw, J.E., Sr., Waller, D.P., 2006. Specific human CYP 450 isoform metabolism of a  
593 pentachlorobiphenyl (PCB-IUPAC# 101). *Biochem. Biophys. Res. Commun.* 344, 129-133.
- 594 Milanowski, B., Lulek, J., Lehmler, H.J., Kania-Korwel, I., 2010. Assessment of the disposition of  
595 chiral polychlorinated biphenyls in female *mdr 1a/b* knockout versus wild-type mice using  
596 multivariate analyses. *Environ. Int.* 36, 884-892.
- 597 Nagayoshi, H., Kakimoto, K., Konishi, Y., Kajimura, K., Nakano, T., 2018. Determination of the human  
598 cytochrome P450 monooxygenase catalyzing the enantioselective oxidation of 2,2',3,5',6-  
599 pentachlorobiphenyl (PCB 95) and 2,2',3,4,4',5',6-heptachlorobiphenyl (PCB 183). *Environ. Sci.*  
600 *Pollut. Res. Int.* 25, 16420-16426.
- 601 Niknam, Y., Feng, W., Cherednichenko, G., Dong, Y., Joshi, S.N., Vyas, S.M., Lehmler, H.J., Pessah,  
602 I.N., 2013. Structure-activity relationship of selected meta- and para-hydroxylated non-dioxin like  
603 polychlorinated biphenyls: from single RyR1 channels to muscle dysfunction. *Toxicol. Sci.* 136,  
604 500-513.
- 605 Norstroem, K., Bergman, A., 2006. Chiral PCB methyl sulfones and their metabolic formation.  
606 *Organohalogen Compd.* 68, 21-24.
- 607 Norstrom, K., Eriksson, J., Haglund, J., Silvani, V., Bergman, A., 2006. Enantioselective formation of  
608 methyl sulfone metabolites of 2,2',3,3',4,6'-hexachlorobiphenyl in rat. *Environ. Sci. Technol.* 40,  
609 7649-7655.
- 610 Ohta, C., Haraguchi, K., Kato, Y., Endo, T., Koga, N., 2012. Involvement of rat CYP3A enzymes in the  
611 metabolism of 2,2',3,4',5',6-hexachlorobiphenyl (CB149). *Organohalogen Compd.* 74, 1475-1478.
- 612 Parkinson, A., Safe, S.H., Robertson, L.W., Thomas, P.E., Ryan, D.E., Reik, L.M., Levin, W., 1983.  
613 Immunochemical quantitation of cytochrome P-450 isozymes and epoxide hydrolase in liver

- 614 microsomes from polychlorinated or polybrominated biphenyl-treated rats. A study of structure-  
615 activity relationships. *J. Biol. Chem.* 258, 5967-5976.
- 616 Pencikova, K., Brenerova, P., Svrzkova, L., Hrubá, E., Palkova, L., Vondracek, J., Lehmler, H.J.,  
617 Machala, M., 2018. Atropisomers of 2,2',3,3',6,6'-hexachlorobiphenyl (PCB 136) exhibit  
618 stereoselective effects on activation of nuclear receptors in vitro. *Environ. Sci. Pollut. Res. Int.* 25,  
619 16411-16419.
- 620 Pessah, I.N., Cherednichenko, G., Lein, P.J., 2010. Minding the calcium store: Ryanodine receptor  
621 activation as a convergent mechanism of PCB toxicity. *Pharmacol. Ther.* 125, 260-285.
- 622 Peverati, R., Truhlar, D.G., 2011. Improving the Accuracy of Hybrid Meta-GGA Density Functionals  
623 by Range Separation. *The Journal of Physical Chemistry Letters* 2, 2810-2817.
- 624 Preston, B.D., Miller, J.A., Miller, E.C., 1983. Non-arene oxide aromatic ring hydroxylation of 2,2',5,5'-  
625 tetrachlorobiphenyl as the major metabolic pathway catalyzed by phenobarbital-induced rat liver  
626 microsomes. *J. Biol. Chem.* 258, 8304-8311.
- 627 Püttmann, M., Arand, M., Oesch, F., Mannschreck, A., Robertson, L., 1990. Chirality and the induction  
628 of xenobiotic-metabolizing enzymes: Effects of the atropisomers of the polychlorinated biphenyl  
629 2,2',3,4,4',6-hexachlorobiphenyl, in: Frank, H., Holmstedt, B., Testa, B. (Eds.), *Chirality and*  
630 *Biological Activity*. Alan R. Liss, Inc., New York, pp. 177-184.
- 631 Püttmann, M., Mannschreck, A., Oesch, F., Robertson, L., 1989. Chiral effects in the induction of drug-  
632 metabolizing enzymes using synthetic atropisomers of polychlorinated biphenyls (PCBs). *Biochem.*  
633 *Pharmacol.* 38, 1345-1352.
- 634 Richardson, J.R., Miller, G.W., 2004. Acute exposure to aroclor 1016 or 1260 differentially affects  
635 dopamine transporter and vesicular monoamine transporter 2 levels. *Toxicol. Lett.* 148, 29-40.
- 636 Rodman, L.E., Shedlofsky, S.I., Mannschreck, A., Püttmann, M., Swim, A.T., Robertson, L.W., 1991.  
637 Differential potency of atropisomers of polychlorinated biphenyls on cytochrome P450 induction

638 and uroporphyrin accumulation in the chick embryo hepatocyte culture. *Biochem. Pharmacol.* 41,  
639 915-922.

640 Safe, S., Bandiera, S., Sawyer, T., Robertson, L., Safe, L., Parkinson, A., Thomas, P.E., Ryan, D.E.,  
641 Reik, L.M., Levin, W., et al., 1985. PCBs: structure-function relationships and mechanism of action.  
642 *Environ. Health Perspect.* 60, 47-56.

643 Schecter, A., Colacino, J., Haffner, D., Patel, K., Opel, M., Papke, O., Birnbaum, L., 2010.  
644 Perfluorinated compounds, polychlorinated biphenyls, and organochlorine pesticide contamination  
645 in composite food samples from Dallas, Texas, USA. *Environ. Health Perspect.* 118, 796-802.

646 Schnellmann, R.G., Putnam, C.W., Sipes, I.G., 1983. Metabolism of 2,2',3,3',6,6'-hexachlorobiphenyl  
647 and 2,2',4,4',5,5'-hexachlorobiphenyl by human hepatic microsomes. *Biochem. Pharmacol.* 32,  
648 3233-3239.

649 Seegal, R.F., 1996. Epidemiological and laboratory evidence of PCB induced neurotoxicity. *Crit. Rev.*  
650 *Toxicol.* 26, 709-737.

651 Su, G., Liu, X., Gao, Z., Xian, Q., Feng, J., Zhang, X., Giesy, J.P., Wei, S., Liu, H., Yu, H., 2012.  
652 Dietary intake of polybrominated diphenyl ethers (PBDEs) and polychlorinated biphenyls (PCBs)  
653 from fish and meat by residents of Nanjing, China. *Environ. Int.* 42, 138-143.

654 Tehrani, R., Van Aken, B., 2014. Hydroxylated polychlorinated biphenyls in the environment: sources,  
655 fate, and toxicities. *Environ. Sci. Pollut. Res. Int.* 21, 6334-6345.

656 Thomas, K., Xue, J., Williams, R., Jones, P., Whitaker, D., 2012. Polychlorinated biphenyls (PCBs) in  
657 school buildings: Sources, environmental levels, and exposures. United States Environmental  
658 Protection Agency, Office of Research and Development, National Exposure Research Laboratory.

659 Uwimana, E., Li, X., Lehmler, H.J., 2016. 2,2',3,5',6-Pentachlorobiphenyl (PCB 95) is atropselectively  
660 metabolized to para hydroxylated metabolites by human liver microsomes. *Chem. Res. Toxicol.* 29,  
661 2108-2110.

- 662 Uwimana, E., Li, X., Lehmler, H.J., 2018. Human liver microsomes atropselectively metabolize  
663 2,2',3,4',6-pentachlorobiphenyl (PCB 91) to a 1,2-shift product as the major metabolite. *Environ.*  
664 *Sci. Technol.* 52, 6000-6008.
- 665 Uwimana, E., Maiers, A., Li, X., Lehmler, H.J., 2017. Microsomal metabolism of prochiral  
666 polychlorinated biphenyls results in the enantioselective formation of chiral metabolites. *Environ.*  
667 *Sci. Technol.* 51, 1820-1829.
- 668 Vetter, W., 2016. Gas chromatographic enantiomer separation of polychlorinated biphenyls (PCBs):  
669 Methods, metabolisms, enantiomeric composition in environmental samples and their interpretation.  
670 *Isr. J. Chem.* 56, 940-957.
- 671 Voorspoels, S., Covaci, A., Neels, H., 2008. Dietary PCB intake in Belgium. *Environ. Toxicol.*  
672 *Pharmacol.* 25, 179-182.
- 673 Waller, S.C., He, Y.A., Harlow, G.R., He, Y.Q., Mash, E.A., Halpert, J.R., 1999. 2,2',3,3',6,6'-  
674 Hexachlorobiphenyl hydroxylation by active site mutants of cytochrome P450 2B1 and 2B11.  
675 *Chem. Res. Toxicol.* 12, 690-699.
- 676 Warner, N.A., Martin, J.W., Wong, C.S., 2009. Chiral polychlorinated biphenyls are biotransformed  
677 enantioselectively by mammalian cytochrome P-450 isozymes to form hydroxylated metabolites.  
678 *Environ. Sci. Technol.* 43, 114-121.
- 679 Weigend, F., Ahlrichs, R., 2005. Balanced basis sets of split valence, triple zeta valence and quadruple  
680 zeta valence quality for H to Rn: Design and assessment of accuracy. *Phys. Chem. Chem. Phys.* 7,  
681 3297-3305.
- 682 Whitcomb, B.W., Schisterman, E.F., Buck, G.M., Weiner, J.M., Greizerstein, H., Kostyniak, P.J., 2005.  
683 Relative concentrations of organochlorines in adipose tissue and serum among reproductive age  
684 women. *Environ. Toxicol. Pharmacol.* 19, 203-213.

- 685 Wong, C.S., Garrison, A.W., Smith, P.D., Foreman, W.T., 2001. Enantiomeric composition of chiral  
686 polychlorinated biphenyl atropisomers in aquatic and riparian biota. *Environ. Sci. Technol.* 35,  
687 2448-2454.
- 688 Wu, X., Duffel, M., Lehmler, H.J., 2013a. Oxidation of polychlorinated biphenyls by liver tissue slices  
689 from phenobarbital-pretreated mice is congener-specific and atropselective. *Chem. Res. Toxicol.* 26,  
690 1642-1651.
- 691 Wu, X., Kammerer, A., Lehmler, H.J., 2014. Microsomal oxidation of 2,2',3,3',6,6'-hexachlorobiphenyl  
692 (PCB 136) results in species-dependent chiral signatures of the hydroxylated metabolites. *Environ.*  
693 *Sci. Technol.* 48, 2436-2444.
- 694 Wu, X., Kania-Korwel, I., Chen, H., Stamou, M., Dammanahalli, K.J., Duffel, M., Lein, P.J., Lehmler,  
695 H.J., 2013b. Metabolism of 2,2',3,3',6,6'-hexachlorobiphenyl (PCB 136) atropisomers in tissue slices  
696 from phenobarbital or dexamethasone-induced rats is sex-dependent. *Xenobiotica* 43, 933-947.
- 697 Wu, X., Lehmler, H.J., 2016. Effects of thiol antioxidants on the atropselective oxidation of  
698 2,2',3,3',6,6'-hexachlorobiphenyl (PCB 136) by rat liver microsomes. *Environ. Sci. Pollut. Res. Int.*  
699 23, 2081-2088.
- 700 Wu, X., Pramanik, A., Duffel, M.W., Hrycay, E.G., Bandiera, S.M., Lehmler, H.J., Kania-Korwel, I.,  
701 2011. 2,2',3,3',6,6'-Hexachlorobiphenyl (PCB 136) is enantioselectively oxidized to hydroxylated  
702 metabolites by rat liver microsomes. *Chem. Res. Toxicol.* 24, 2249-2257.
- 703 Yang, D., Kania-Korwel, I., Ghogha, A., Chen, H., Stamou, M., Bose, D.D., Pessah, I.N., Lehmler, H.J.,  
704 Lein, P.J., 2014. PCB 136 atropselectively alters morphometric and functional parameters of  
705 neuronal connectivity in cultured rat hippocampal neurons via ryanodine receptor-dependent  
706 mechanisms. *Toxicol. Sci.* 138, 379-392.
- 707 Zheng, J., Yan, X., Chen, S.J., Peng, X.W., Hu, G.C., Chen, K.H., Luo, X.J., Mai, B.X., Yang, Z.Y.,  
708 2013. Polychlorinated biphenyls in human hair at an e-waste site in China: composition profiles and  
709 chiral signatures in comparison to dust. *Environ. Int.* 54, 128-133.

710 Zheng, J., Yu, L.H., Chen, S.J., Hu, G.C., Chen, K.H., Yan, X., Luo, X.J., Zhang, S., Yu, Y.J., Yang,  
711 Z.Y., Mai, B.X., 2016. Polychlorinated biphenyls (PCBs) in human hair and serum from e-waste  
712 recycling workers in Southern China: Concentrations, chiral signatures, correlations, and source  
713 identification. *Environ. Sci. Technol.* 50, 1579-1586.

714

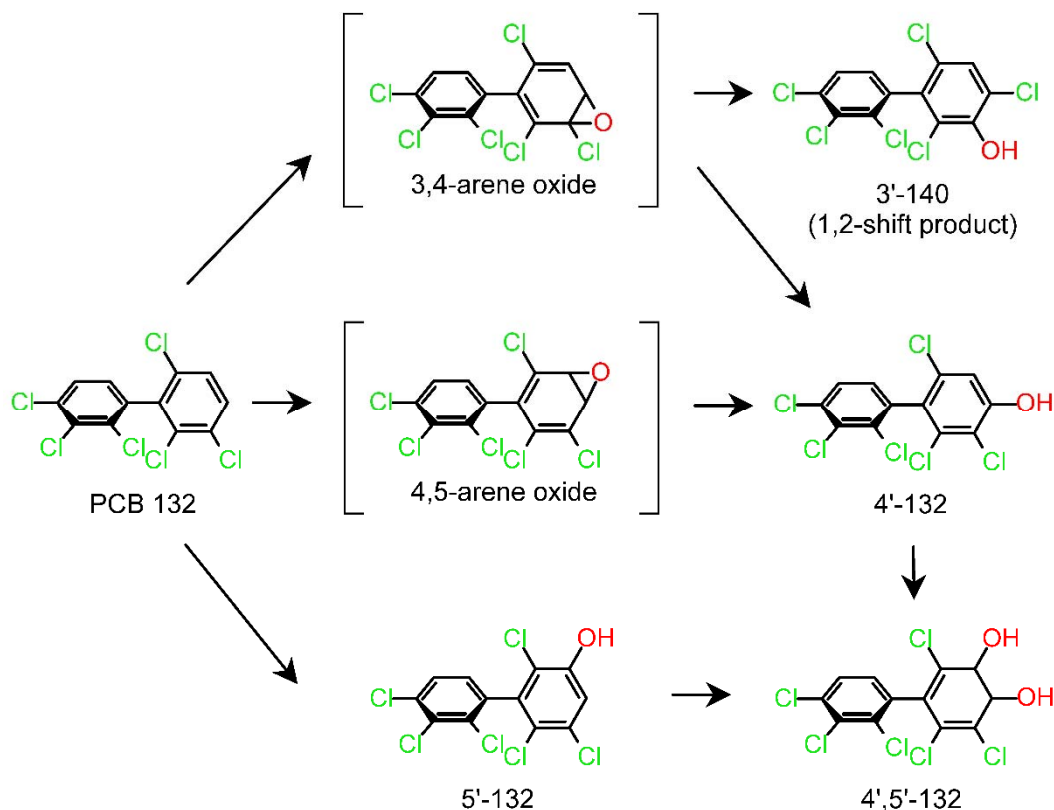

715

716 **Fig. 1.** Proposed metabolism scheme showing the chemical structures of metabolites of racemic PCB

717 132 identified in incubations with HLMs. Only one atropisomer of each metabolite is shown for clarity

718 reasons. Abbreviations: 2,2',3,3',4,6'-hexachlorobiphenyl, PCB 132; 2,2',3,4,4',6'-hexachlorobiphenyl-3-

719 ol, 3'-140; 2,2',3,3',4,6'-hexachlorobiphenyl-4'-ol, 4'-132; 2,2',3,3',4,6'-hexachlorobiphenyl-5'-ol, 5'-132;

720 cytochrome P450 enzymes, P450. The minor dihydroxylated metabolite, 4',5'-132 (4',5'-dihydroxy-

721 2,2',3,3',4,6'-hexachlorobiphenyl), is not shown.

722



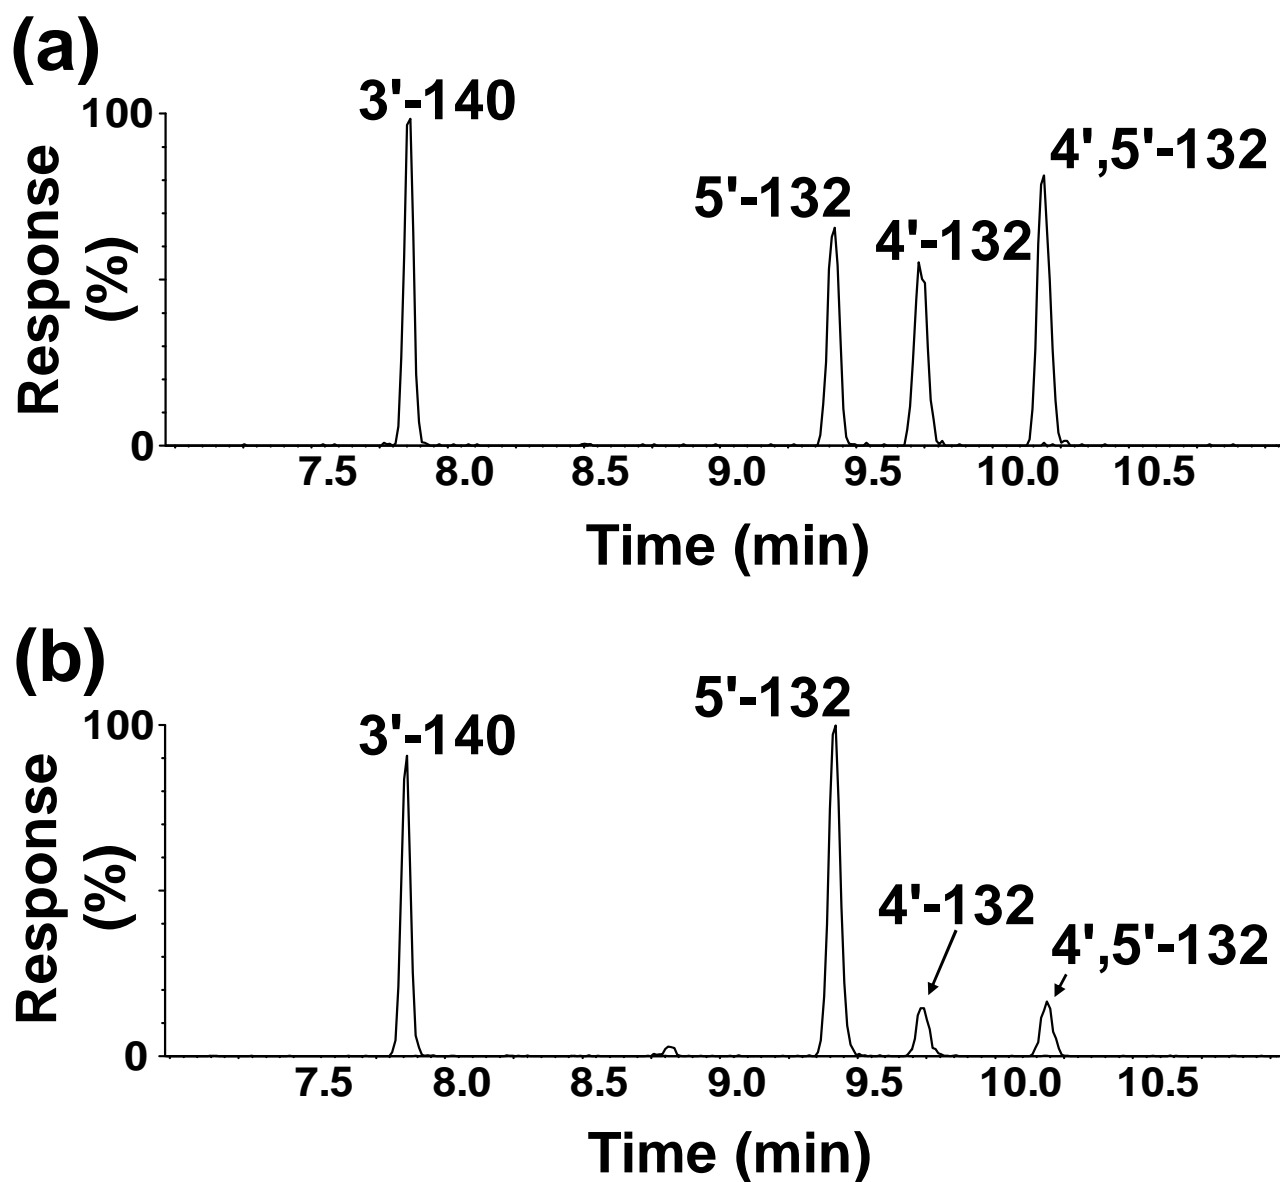

723

724 **Fig. 2. Three monohydroxylated ( $m/z$  387.9) and one dihydroxylated ( $m/z$  417.9) metabolite were**  
725 **identified in incubations of racemic PCB 132 with pHLMs. Representative gas chromatograms**  
726 **showing (a) the reference standard containing four hydroxylated PCB 132 metabolites and (b) an extract**  
727 **from a representative incubation of racemic PCB 132 with pHLMs. All metabolites were analyzed as**  
728 **the corresponding methylated derivatives. Incubations were carried out with 50  $\mu$ M racemic PCB 132,**  
729 **0.3 mg/mL microsomal protein and 1 mM NADPH for 90 min at 37  $^{\circ}$ C. The metabolites were identified**

730 based on their retention times relative to the corresponding authentic standard and their  $m/z$ . For the  
731 corresponding mass spectra, see **Figs. S4 to S11**.

732

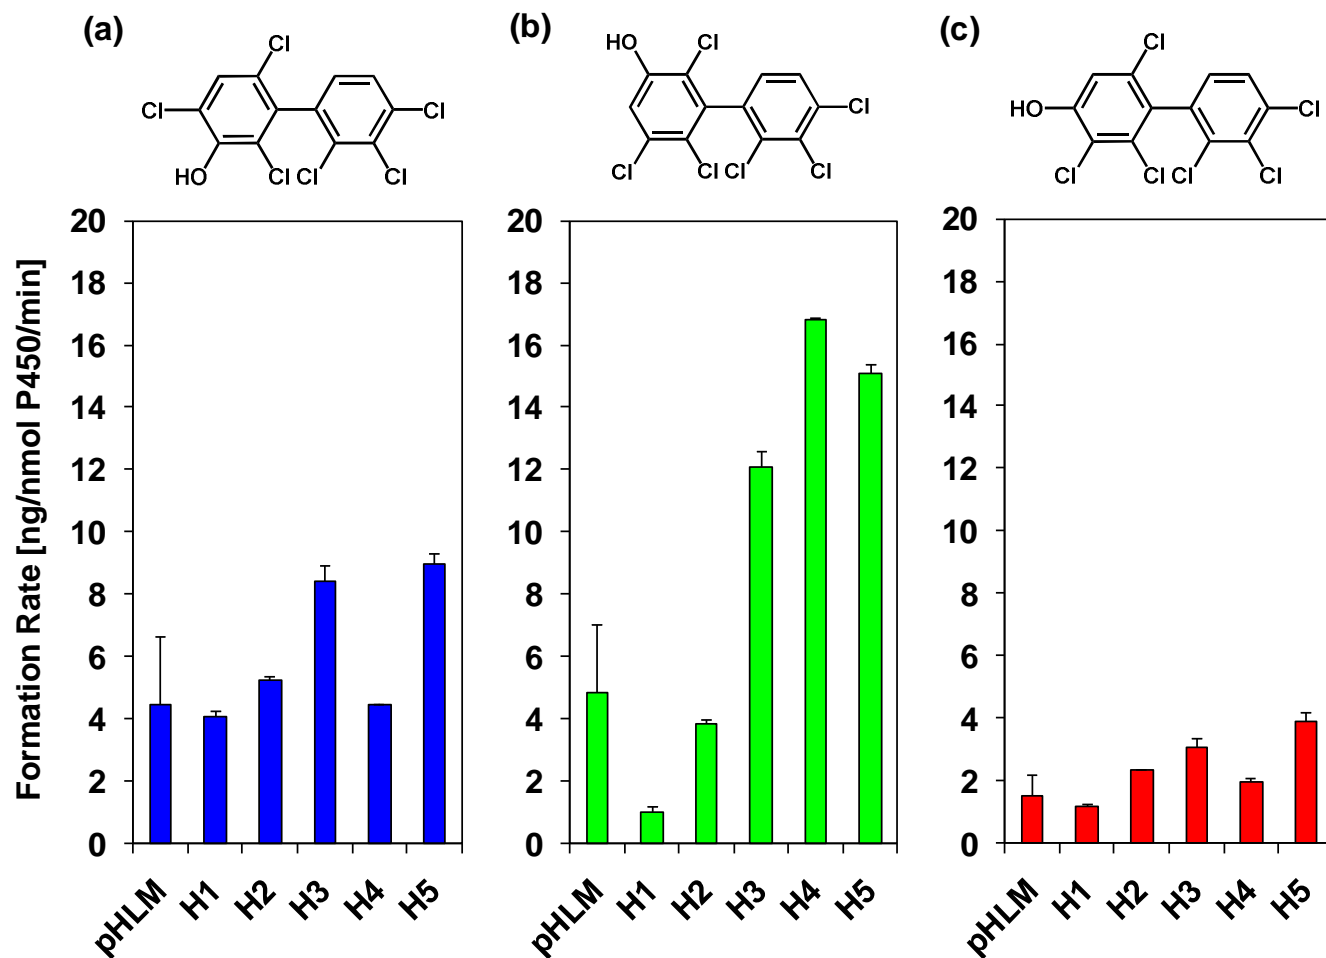

733

734 **Fig. 3. Formation rates of PCB 132 metabolites by different HLM preparations display inter-**  
735 **individual differences, with (a) the *meta* hydroxylated metabolites, 3'-140 (1,2- shift product), and**  
736 **(b) 5'-132, being major metabolites, and (c) the *para* hydroxylated metabolite, 4'-132, being a**  
737 **minor metabolite.** Incubations were carried out with 50  $\mu$ M racemic PCB 132, 0.1 mg/mL microsomal  
738 protein and 1 mM NADPH for 10 min at 37 °C (Tables S3 and S4) as reported earlier (Uwimana et al.,  
739 2016, 2018). Extracts from the microsomal incubations were derivatized with diazomethane and  
740 analyzed by GC- $\mu$ ECD; see Materials and Methods for additional details. Data are presented as mean  $\pm$   
741 standard deviation, n = 3.

742

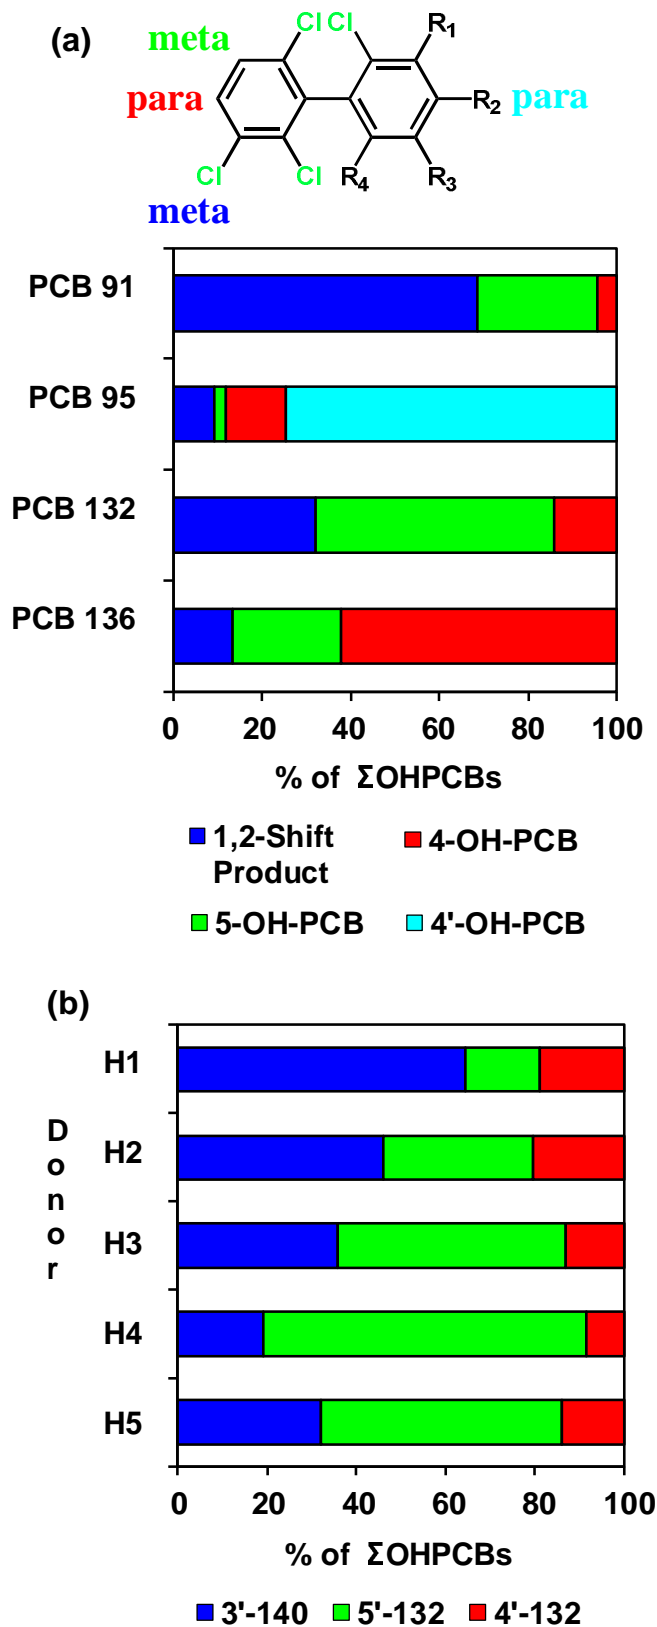

743

744 **Fig. 4.** The profile of PCB 132 OH-PCB metabolite formed by pHLMs is (a) distinctively different  
 745 from the published metabolite profiles of structurally related PCB congeners (*i.e.* PCB 91, PCB 95

746 **and PCB 136) and (b) shows considerable inter individual variability.** (a) Bar diagrams comparing  
747 the profiles of hydroxylated metabolites of PCB 91, PCB 95, PCB 132 and PCB 136 formed in  
748 incubations with pHLMs. PCB 91 (Uwimana et al., 2018) and PCB 132 (this study) are preferentially  
749 oxidized in *meta* position, whereas PCB 95 (Uwimana et al., 2016) and PCB 136 (Wu et al., 2014) are  
750 hydroxylated in *para* position. In the case of PCB 95, the oxidation occurs preferentially in the *para*  
751 position of the lower chlorinated 2,5-dichlorophenyl ring (Uwimana et al., 2016). Incubations were  
752 carried out with 50  $\mu$ M PCB, 0.1 mg/mL microsomal protein and 1 mM NADPH for 5 min (PCB 91 and  
753 PCB 95) or 10 min (PCB 132 and PCB 136) at 37 °C using the same pHLM preparation. (b) Bar  
754 diagrams showing inter-individual differences in profiles of hydroxylated metabolites of PCB 132  
755 formed in incubations with different single donor HLM preparations. Incubations were carried out with  
756 50  $\mu$ M PCB 132, 0.1 mg/mL microsomal protein and 1 mM NADPH for 10 min at 37 °C (Uwimana et  
757 al., 2016). Extracts from the microsomal incubations were derivatized with diazomethane and analyzed  
758 by GC- $\mu$ ECD; see Materials and Methods for additional details.

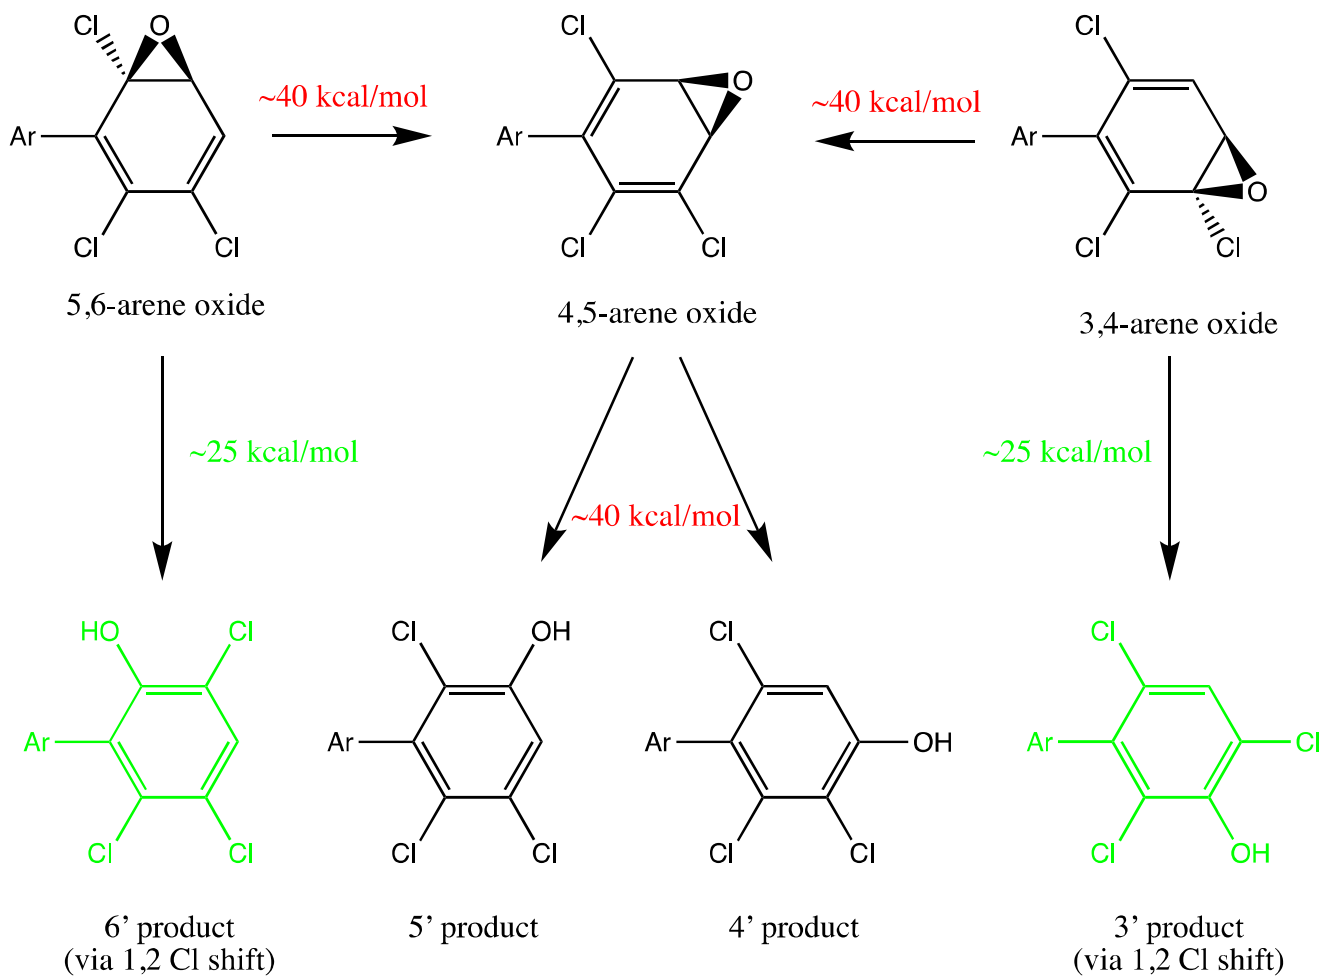

759

760 **Fig. 5. The formation of 1,2 chlorine shift metabolites via arene oxide intermediates of chiral**

761 **PCBs is energetically favored.** Energies shown are free energies of activation at the M11/def2-SVP

762 level of theory with the SMD aqueous continuum solvation model.

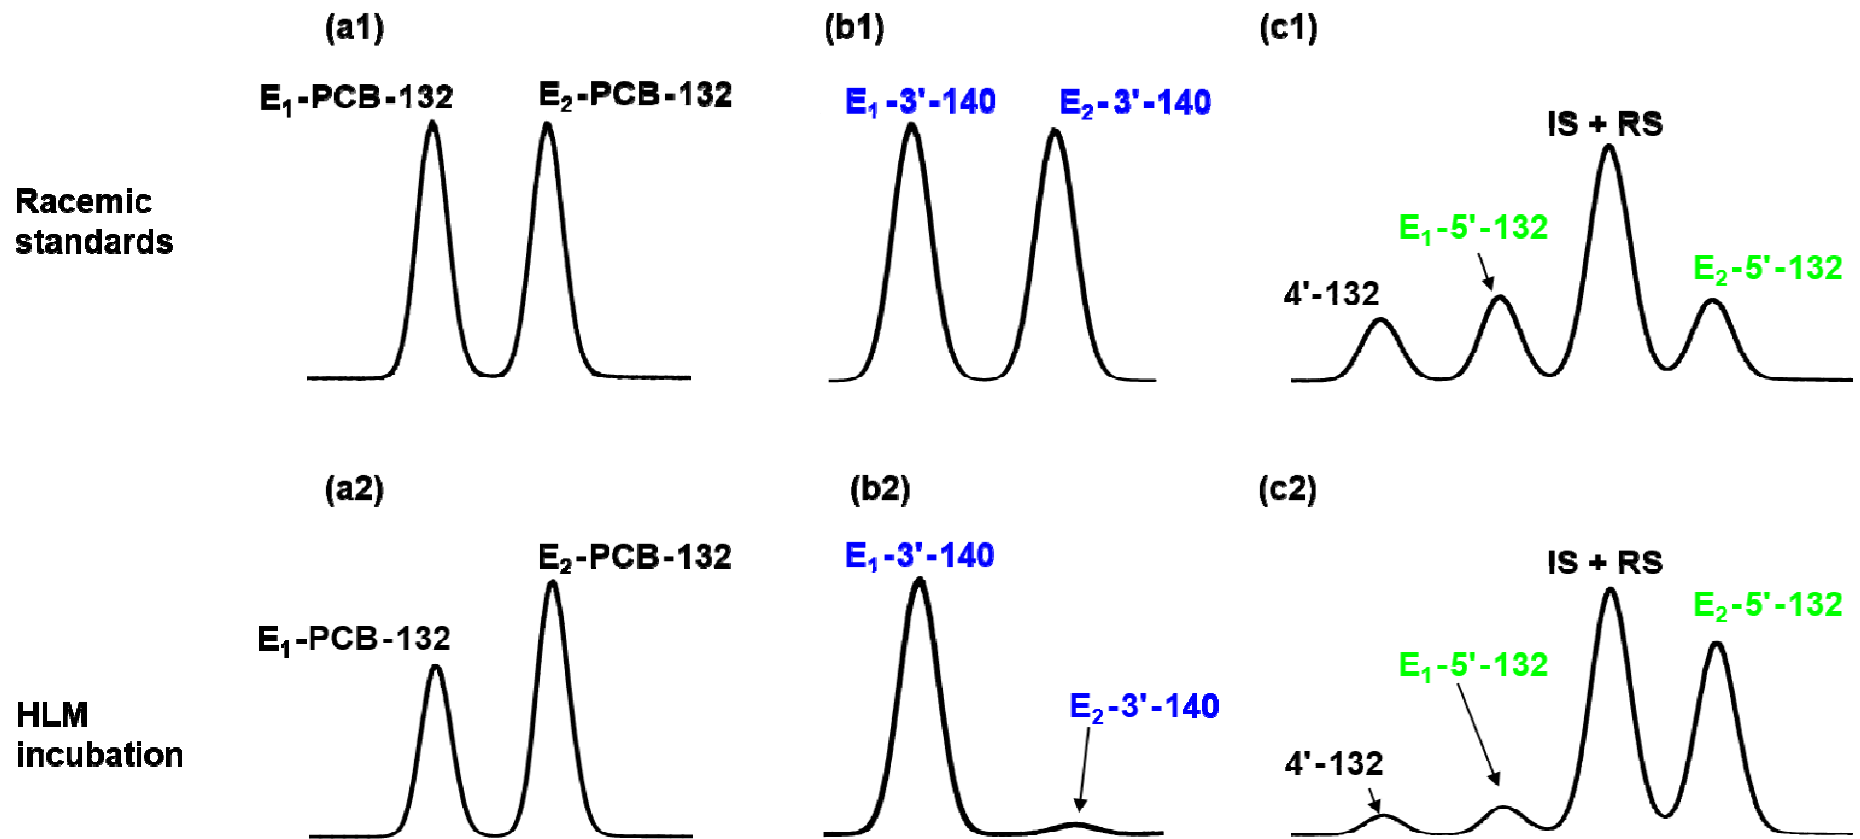

**Fig. 6. Atropselective gas chromatographic analysis revealed the atropselective metabolism of racemic PCB 132 to 5'-132 and 3'-140 in incubations with pHLMs.** Representative gas chromatograms of racemic standards (top panels) vs. PCB 132, 5'-132 and 3'-140 formed in incubations of racemic PCB 132 with HLMs (bottom panels) show a depletion of E<sub>1</sub>-PCB 132 (panels a1 vs. a2) and atropselective formation of E<sub>1</sub>-3'-140 (panels b1 vs. b2) and E<sub>2</sub>-5'-132 (panels c1 vs. c2). To assess the atropselective depletion of PCB 132, incubations were carried out with 5  $\mu$ M PCB 132, 0.5 mg/mL microsomal protein (pHLMs only) and 0.5 mM NADPH for 120 min at 37  $^{\circ}$ C. To study the atropselective formation of the PCB 132 metabolites, incubations were carried out with 50  $\mu$ M racemic PCB 132, 0.1 mg/mL microsomal protein and 1 mM NADPH for 30

min at 37 °C (donor H3 shown here; see Fig. 6 for results from incubations using other human liver microsome preparations) (Uwimana et al., 2016, 2018). Metabolites were analyzed as the corresponding methylated derivatives after derivatization with diazomethane. Atropselective analyses of 3'-140 were performed with a GTA column at 150 °C, and atropselective analyses of PCB 132 and 5'-132 were carried out with a CD column at 160 °C (Kania-Korwel et al., 2011).



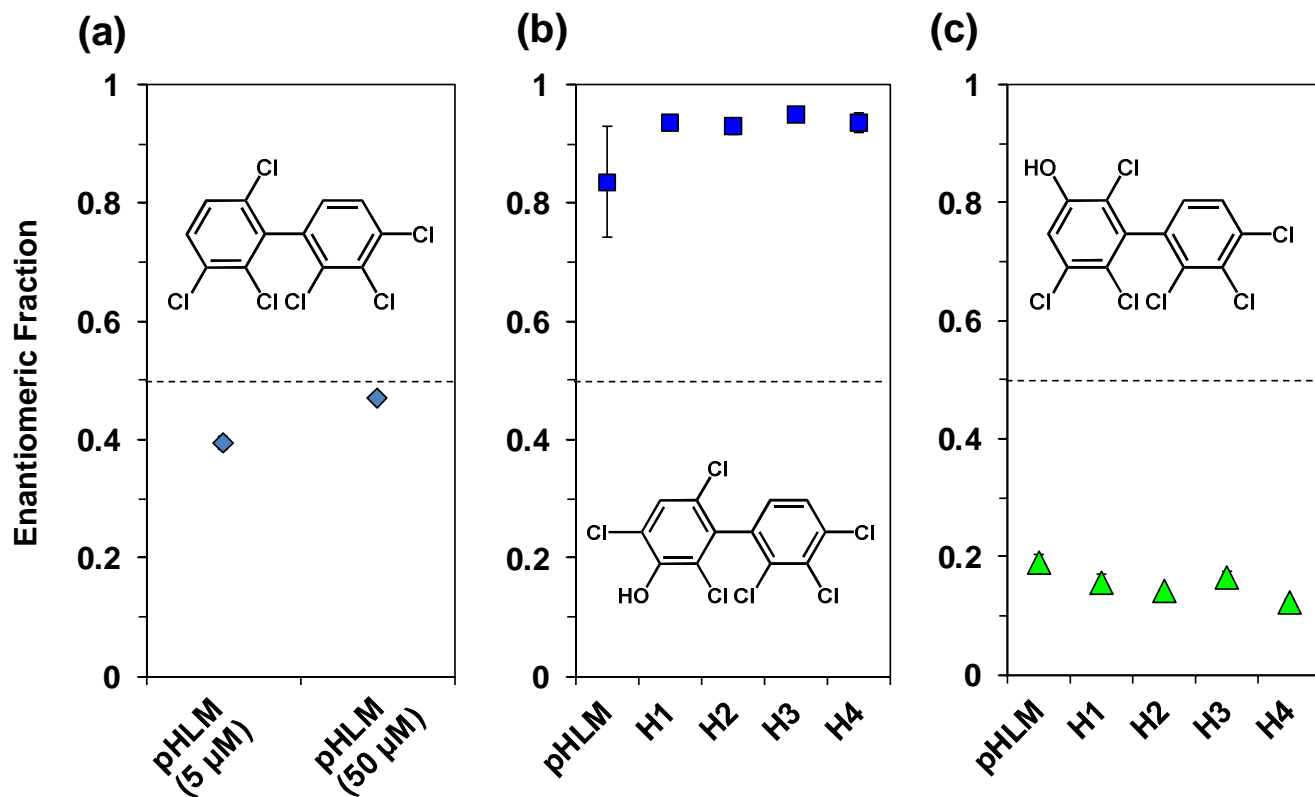

**Fig. 7 Enantiomeric fractions (EFs) of (a) parent PCB 132, (b) 3'-140 and (c) 5'-132 reveal only small inter-individual differences in the atropselective formation of both metabolites.** (a) To assess the atropselective depletion of PCB 132, incubations were carried out with 5  $\mu$ M or 50  $\mu$ M PCB 132, 0.5 mg/mL microsomal protein (using pHLMs only), 0.5 mM NADPH for 120 min at 37  $^{\circ}$ C (see **Fig. 7d** for a representative chromatogram). To study the atropselective formation of (b) 3'-140 and (c) 5'-132, microsomal incubations were carried out with 50  $\mu$ M racemic PCB 132, 0.1 mg/mL microsomal protein, 1 mM NADPH for 30 min at 37  $^{\circ}$ C (Uwimana et al., 2016, 2018). Metabolites were analyzed as the corresponding methylated derivatives. Atropselective analyses of 3'-140 were performed with a GTA column at 150  $^{\circ}$ C, and atropselective analyses of PCB 132 and 5'-132 were carried out with a CD column at 160 $^{\circ}$ C (Kania-Korwel et al., 2011). EF values could not be determined in incubations with HLMs from donor H5 due to the low metabolite levels. Data are presented as mean  $\pm$  standard deviation, n = 3. The dotted line indicates the EF values of the racemic standards. \* EF values were significantly different from the respective racemic standard (t-test, p < 0.05).

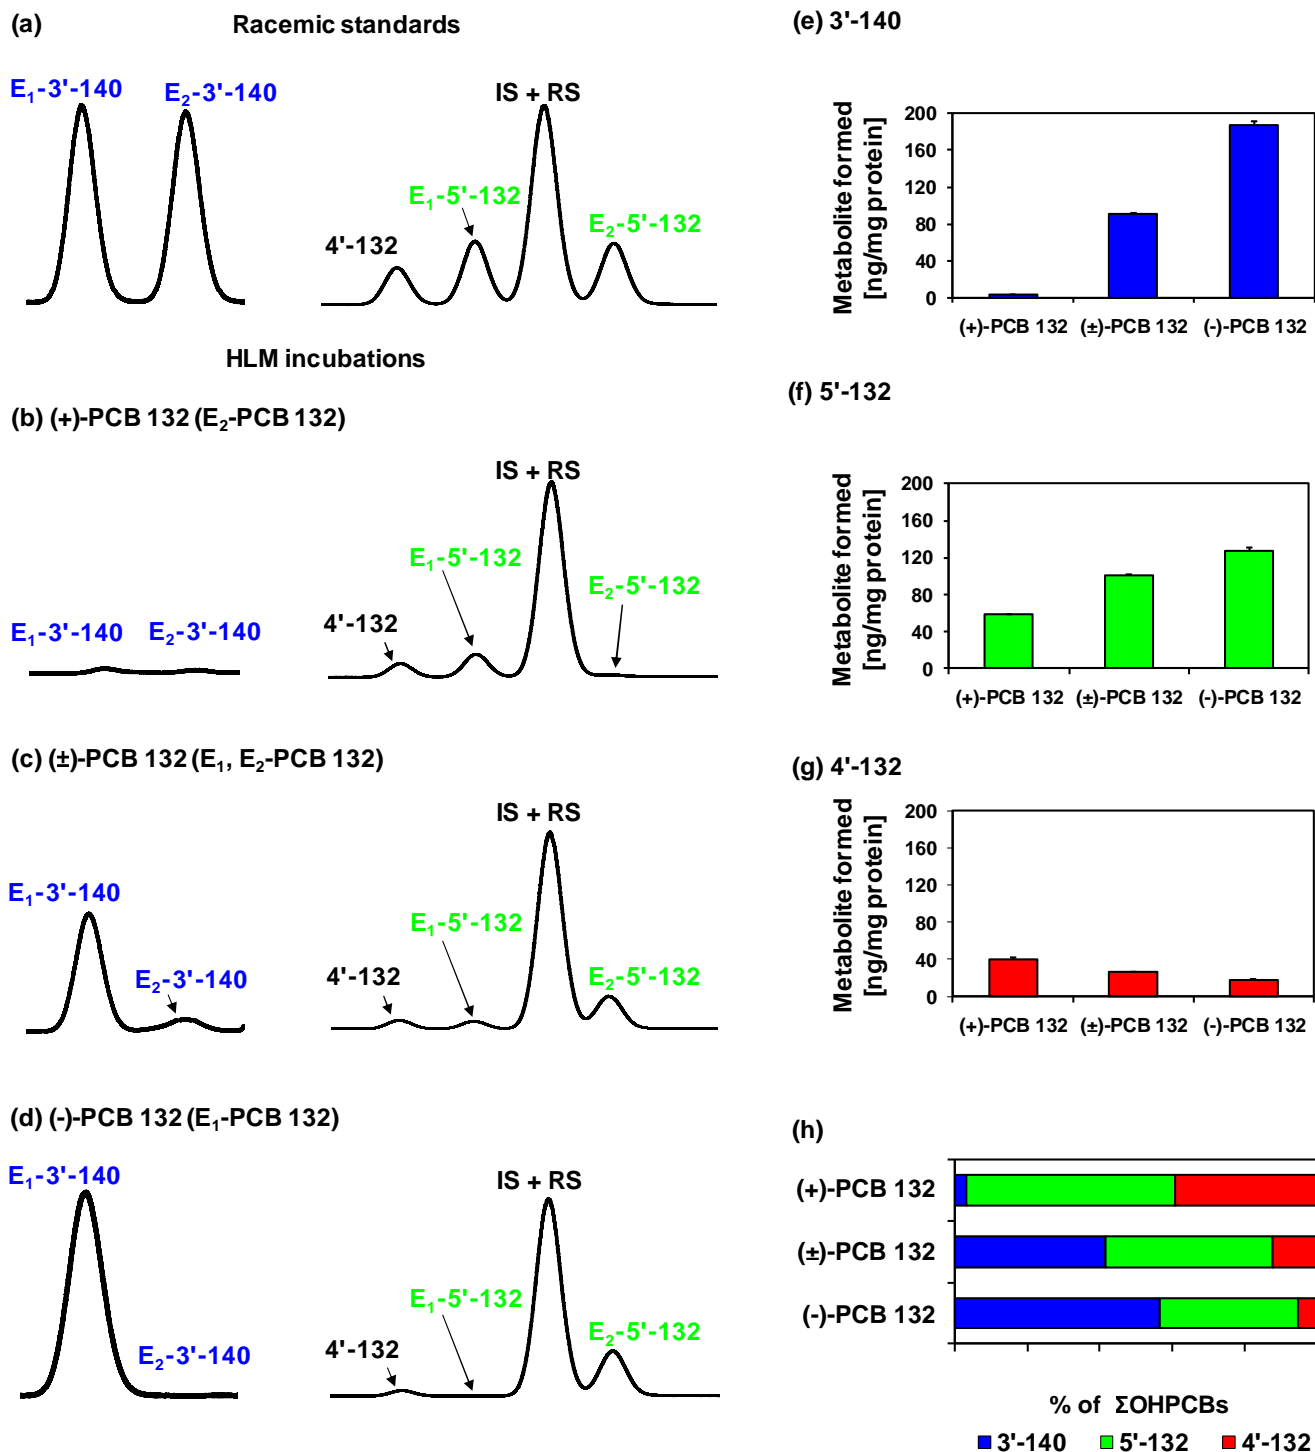

**Fig. 8.** Comparison of representative gas chromatograms of (a) racemic OH-PCB metabolite standards with OH-PCB metabolites formed in incubations of (b) (+)-PCB 132, (c) ( $\pm$ )-PCB 132 or (d) (-)-PCB 132 with pHLMs reveals that  $E_1$ -5'-132 is formed from (+)-PCB 132 and  $E_1$ -3'-140, and  $E_2$ -5'-132 are formed from (-)-PCB. Moreover, (e) 3'-140 and (f) 5'-132, but not (g) 4'-132 are formed more rapidly from (-)-PCB 132 than (+)-PCB 132, resulting (h) in distinct OH-PCB

### **metabolite profiles formed from (+)-, (±)-, and (-)-PCB 132 in incubations with pHLMs.**

Incubations were carried out with 50  $\mu$ M (+)-PCB 132, racemic PCB 132 or (-)-PCB 132, 0.1 mg/mL microsomal protein and 1 mM NADPH for 30 min at 37 °C (Uwimana et al., 2016). Metabolites were analyzed as the corresponding methylated derivatives after derivatization with diazomethane.

Atropselective analyses of 3'-140 were performed with a GTA column at 150 °C, and atropselective analyses of PCB 132 and 5'-132 were carried out with a CD column at 160°C. 4'-132 was not resolved on any of the columns used in this study (Kania-Korwel et al., 2011).
